# Supplementary material for: Systematic literature review and meta-analysis of the efficacy of artemisinin-based and quinine-based treatments for uncomplicated falciparum malaria in pregnancy: methodological challenges
Source: Springer Nature journal article supplement (doi:10.1186/s12936-017-2135-y), 2017-12-01
Supplement: MOESM1 [file 15304954]

## Additional file 1. Search terms for literature review

The terms used for literature search

(malaria or Plasmodium).m\_titl.

"pregnan\*".m\_titl.

(treatment or therap\* or antimalaria\* or anti-malaria\* or artemisinin\* or artesunate\* or dihydroartemisinin\* or artemether\* or chloroquine\* or mefloquine\* or amodiaquine\* or quinine\* or piperazine\* or lumefantrine\* or atovaquone\* or proguanil\* or sulfadoxine\* or pyrimethamine\* or azithromycin\* or clindamycin\*).ab,kf,kw,ti.

(trial or cohort or prospective or follow or intervention or random\* or pharmaco\*).ab,kf,kw,ti.

(efficac\* or success or failure or recrudescence or recurren\* or reappear\* or response or outcome or effect\* or clearance or cure or dose or dosage or surviv\*).ab,kf,kw,ti.

Depending on the number of conditions allowed to use for the search, I used only condition 1 and 2 for ClinicalTrial.gov, 1, 2 and 3 for ICTRP and LILACS.
