# Supplementary material for: Systematic literature review and meta-analysis of the efficacy of artemisinin-based and quinine-based treatments for uncomplicated falciparum malaria in pregnancy: methodological challenges
Source: Springer Nature journal article supplement (doi:10.1186/s12936-017-2135-y), 2017-12-01
Supplement: MOESM3 [file 15304954]

Additional file 3. Summary of the study design and reported outcomes.

| Study Country Study year                                             | Study design Treatment: N               | Trimester | Efficacy endpoint reported                                                                                                 | Intermittent preventive treatment             | Dosing of treatment                                                                                                                                                                                                                                                                                                                                                                              |
|----------------------------------------------------------------------|-----------------------------------------|-----------|----------------------------------------------------------------------------------------------------------------------------|-----------------------------------------------|--------------------------------------------------------------------------------------------------------------------------------------------------------------------------------------------------------------------------------------------------------------------------------------------------------------------------------------------------------------------------------------------------|
| Naing, 1988<br>Myanmar<br>1985-1986<br>[36]                          | RCT<br>Q: 23<br>AQ: 19                  | 2,3       | Fever clearance time<br>Parasite clearance time                                                                            | Not applicable<br>(not Sub-Saharan<br>Africa) | Q: quinine dihydrochloride 10mg salt/kg x 3 times/day for 7 days orally or intravenously depending on the clinical condition                                                                                                                                                                                                                                                                     |
| Harinasuta, 1990<br>Thailand<br>INA<br>[37] (conference<br>abstract) | RCT<br>Q: 82<br>MFQ: 85                 | 1,2,3     | Parasite clearance on day 7                                                                                                | Not applicable<br>(not Sub-Saharan<br>Africa) | Q: quinine sulfate 600mg x 3times/day for 7 days                                                                                                                                                                                                                                                                                                                                                 |
| Nosten, 1993<br>Thailand<br>1989-1990<br>[23]                        | RCT<br>Q5: 16<br>Q5 +<br>spiramycin: 16 | 2,3       | Recurrence rate within 28 days<br>Parasite clearance time                                                                  | Not applicable<br>(not Sub-Saharan<br>Africa) | Q: quinine sulphate 30mg salt/kg/day for 5 days<br>spiramycin: 1.2M IU x 3 times/day for 5 days                                                                                                                                                                                                                                                                                                  |
| Sowunmi, 1998<br>Nigeria<br>1994-1997<br>[38]                        | RCT<br>AM: 23<br>AMMQ: 22               | 2,3       | Cure rate on day 14 /28<br>Fever clearance time<br>Parasite clearance time<br>Peripheral parasitaemia of newborns at birth | Information not<br>available                  | AM: 3.2 mg/kg given intramuscularly on day 0, followed by 1.6 mg/kg/day for 4 days<br>AMMQ: single dose of 3.2 mg/kg AM intramuscularly on day 0, followed by 7.5mg/kg/day MQ for 2 days                                                                                                                                                                                                         |
| Bounyasong, 2001<br>Thailand<br>1995-1998<br>[39]                    | RCT<br>ASMQ: 29<br>Q: 28                | 2,3       | Recrudescence within 28 days<br>Fever clearance time<br>Parasite clearance time                                            | Not applicable<br>(not Sub-Saharan<br>Africa) | AS: Oral artesunate 2 mg/kg for the first dose, 1 mg/kg every 12 hours orally for 5 days minimally (The treatment might be extended until the parasites were absent and the patients had clinical improvement)<br>MQ: 25mg/kg (split on day 6: 15 mg/kg and 6 hours later 10 mg/kg)<br>Q: Quinine sulfate 10 mg/kg x 3 times/day for at least 7 days until the patients had clinically recovered |

Additional file 3 continued.

| Study Country Study year                         | Study design Treatment: N                          | Trimester | Efficacy endpoint reported                                                                                                                                      | Intermittent preventive treatment                                                                       | Dosing of treatment                                                                                                                                                                                                            |
|--------------------------------------------------|----------------------------------------------------|-----------|-----------------------------------------------------------------------------------------------------------------------------------------------------------------|---------------------------------------------------------------------------------------------------------|--------------------------------------------------------------------------------------------------------------------------------------------------------------------------------------------------------------------------------|
| McGready, 2000<br>Thailand<br>1995-1997<br>[40]  | RCT<br>Q: 42<br>ASMQ: 66                           | 2,3       | Cure rates on day 63<br>Fever clearance by 48h<br>Parasite clearance by 48h                                                                                     | Not applicable<br>(not Sub-Saharan Africa)                                                              | Q: 10 mg salt/kg x 3 times/day for 7 days<br>AS (Guilin): 4mg/kg/day for 3 days<br>MQ (Lariam): 25 mg base/kg given as 15 mg/kg on day 1 and 10 mg/kg on day 2                                                                 |
| McGready, 2001a<br>Thailand<br>1997-2000<br>[41] | RCT<br>QC: 65<br>AS: 64                            | 2,3       | Cumulative cure rate on day 42<br>Fever clearance by 48h<br>Parasite clearance by 48h<br>Gametocyte carriage                                                    | Not applicable<br>(not Sub-Saharan Africa)                                                              | Q: 10 mg salt/kg x 3 times/day for 7 days<br>Clindamycin: 5 mg/kg x 3 times/day for 7 days<br>AS (Guilin): 2 mg/kg daily on days 0, 1, 2, 3 and 4 and 1 mg/kg daily on days 5 and 6 (total 10mg/kg)                            |
| McGready, 2005<br>Thailand<br>2001-2003<br>[42]  | RCT<br>AAP: 39<br>Q: 42                            | 2,3       | Cumulative cure rate at delivery or on day 63<br>Fever clearance on day 2, 3 & 4<br>Parasite clearance time<br>Gametocyte carriage                              | Not applicable<br>(not Sub-Saharan Africa)                                                              | AS (Guilin): 4mg/kg/day for 3 days (50mg tablet)<br>AP (Malarone): (atovaquone 20 mg/kg/day and 8 mg/kg/d) for 3 days (250+100mg tablet)<br>With 200mL of chocolate milk (8% fat)<br>Q: 10 mg salt/kg x 3 times/day for 7 days |
| Adam, 2004a<br>Sudan<br>2002-2003<br>[43]        | RCT<br>Q (low dose): 18<br>Q (standard dose): 24   | 2,3       | Failure rate within 28 days<br>Fever clearance time<br>Parasite clearance time                                                                                  | Information not available                                                                               | Low dose group: quinine 10mg/kg x 2 times/day for 7 days<br>Standard dose group: quinine 10mg/kg x 3 times/day for 7 days<br>Quinine was administered intravenously until patients could tolerate                              |
| Kalilani, 2007<br>Malawi<br>2003-2004<br>[44]    | RCT<br>ASSP: 47<br>SP: 47<br>SP + azithromycin: 47 | 2         | Recrudescence rate within 28 days<br>Fever clearance on day 3<br>Parasite clearance on day 2 & 3<br>Parasitaemia at delivery<br>Prevalence of placental malaria | The second dose of the same drug was administered at least 4 weeks after the first dose instead of IPTp | AS: 200mg/day for 3 days<br>SP: 1500+75mg as a single dose                                                                                                                                                                     |
| McGready, 2008<br>Thailand<br>2004-2006<br>[45]  | RCT<br>AL: 125<br>AS: 128                          | 2,3       | Cumulative cure rate at delivery or on day 42<br>Fever clearance time<br>Parasite clearance time<br>Placental / cord blood malaria                              | Not applicable<br>(not Sub-Saharan Africa)                                                              | AL (Coartem): (80+480mg) x 2 times/day for 3 days (at 0, 8, 24, 36, 48 and 60 h)<br>With 250mL of chocolate milk containing 7g of fat<br>AS (Guilin): 2mg/kg x 1 time/day for 7 days (50mg tablet)                             |

## Additional file 3 continued.

| Study Country Study year                                                              | Study design Treatment: N                           | Trimester | Efficacy endpoint reported                                                                                                                                                                                                                                  | Intermittent preventive treatment                                                      | Dosing of treatment                                                                                                                                                                                                                                                                              |
|---------------------------------------------------------------------------------------|-----------------------------------------------------|-----------|-------------------------------------------------------------------------------------------------------------------------------------------------------------------------------------------------------------------------------------------------------------|----------------------------------------------------------------------------------------|--------------------------------------------------------------------------------------------------------------------------------------------------------------------------------------------------------------------------------------------------------------------------------------------------|
| Mutabingwa, 2009<br>Tanzania<br>2004-2006<br>[46]                                     | RCT<br>ASAQ: 83<br>AQSP: 80<br>CD: 81<br>SP: 28     | 2,3       | Recurrence rate within 28 days<br>Gametocyte carriage                                                                                                                                                                                                       | Information not available                                                              | AQ: 10 mg/kg/day for 3 days<br>AS: 4 mg/kg/day for 3 days                                                                                                                                                                                                                                        |
| Kaye, 2008<br>Uganda<br>2006<br>[47]                                                  | RCT<br>AL: 57<br>CD: 57                             | 2,3       | Cure rate on day 28<br>Fever clearance<br>Parasite clearance                                                                                                                                                                                                | Information not available                                                              | AL (Coartem): (80+400mg) x 2 times/day for 3 days<br>*Assumed to be 80+480mg                                                                                                                                                                                                                     |
| Piola, 2010<br>Uganda<br>2006-2009<br>[48]                                            | RCT<br>AL: 152<br>Q: 152                            | 2,3       | Cure rate and cumulative recurrence by day 42<br>Cure rate and cumulative recurrence by delivery<br>Fever clearance on day 0, 1, 2 & 3<br>Parasite clearance on day 2 & 3<br>Gametocyte clearance within 7 days<br>Gametocyte carriage<br>Placental malaria | IPTp was interrupted while study period                                                | AL: (80+480mg) x 2 times/day for 3 days (at 0, 8, 24, 36, 48 and 60 h)<br>With 200mL milk<br>Q: quinine hydrochloride 10 mg base/kg x 3 times/day for 7 days (300 mg of the base per tablet)                                                                                                     |
| Carmona-Fonseca, 2013<br>Colombia<br>2008-2011<br>[49]                                | RCT<br>AL: 15<br>ASMQ: 15                           | 2,3       | Cure rate on day 28                                                                                                                                                                                                                                         | Not applicable (not Sub-Saharan Africa)                                                | AL (80mg+480mg) x 2times/day for 3 days<br>AS 4 mg/kg x 1 time/day for 3 days (50mg tablet)<br>MQ 25 mg base/kg, divided into 2 or 3 days (250mg tablet)                                                                                                                                         |
| D'Alessandro, 2016<br>Burkina Faso, Ghana, Malawi and Zambia<br>2010-2013<br>[50, 51] | RCT<br>AL: 880<br>ASAQ: 842<br>ASMQ: 848<br>DP: 853 | 2,3       | Cure rate on day 63<br>Parasite clearance on day 1 & 2<br>Prevalence of placental malaria<br>Gametocytaemia                                                                                                                                                 | Some patients received IPTp-SP before the trial<br>IPTp-SP was restarted after 63 days | AL (Coartem): (80+480mg) x 2times/day for 3 days<br>With recommendation to take high-fat food or drinks together<br>ASAQ (Winthrop): (200+540mg) x 1 time/day for 3 days<br>ASMQ (Farmanguinhos): (200+440mg/day) x 1 time/day for 3 days<br>DP (Eurartesim): (120+960mg) x 1time/day for 3 days |

Additional file 3 continued.

| Study Country Study year                                              | Study design Treatment: N                           | Trimester | Efficacy endpoint reported                                                           | Intermittent preventive treatment                       | Dosing of treatment                                                                                                                                                                              |
|-----------------------------------------------------------------------|-----------------------------------------------------|-----------|--------------------------------------------------------------------------------------|---------------------------------------------------------|--------------------------------------------------------------------------------------------------------------------------------------------------------------------------------------------------|
| Osarfo, 2017<br>Ghana<br>2011-2012<br>[52]                            | RCT<br>ASAQ: 205<br>DP: 212                         | 2,3       | Cure rate on day 42<br>Cure rate on day 28<br>Placental malaria                      | IPTp-SP was not given during the study period (42 days) | ASAQ (Arsuamoon)<br>AS 4mg/kg and AQ 10mg/kg in twelve hourly doses over 3 days<br>DP (P-alaxin)<br>Total dosing of 6.75mg/kg DHA and 55mg/kg PPQ over 3 days rounded to the nearest half tablet |
| Onyamboko, 2015<br>DRC<br>2013-2014<br>[53] (conference abstract)     | RCT<br>AL: 48<br>AL5: 48                            | 2,3       | Cure rate on day 42<br>Placental malaria                                             | Information not available                               | AL for 3 days (6 doses)<br>AL for 5 days (10 doses)<br>With milk                                                                                                                                 |
| Ukah, 2015<br>Nigeria<br>2013<br>[54]                                 | RCT<br>AL: 75<br>ASAQ: 75                           | 2,3       | Cure rate on day 28<br>Symptom clearance time<br>Parasite clearance by day 3         | IPTp-SP x 2                                             | AL (GloatemForte): (80+480mg) x 2 times/day for 3 days<br>ASAQ (Winthrop): (100+270mg) x 2 times/day for 3 days                                                                                  |
| Iribhogbe, 2017a<br>Nigeria<br>2013-2014<br>[55]                      | RCT<br>AL: 40<br>ASAQ: 40                           | 2,3       | Recurrence within 28 days<br>Fever clearance on day 3<br>Parasite clearance on day 3 | Information not available                               | AL: (80+480mg) x 2 times/day for 3 days<br>ASAQ: (300/810mg) x once a day for 3 days                                                                                                             |
| CTRI/2009/091/001055<br>India<br>2010-2015<br>[56] (registered trial) | RCT<br>ASMQ (500)<br>ASSP (500)<br>* Planned number | 2,3       | Cure rate on day 63<br>Recurrence by day 63                                          | Not applicable (not Sub-Saharan Africa)                 | AS: 200mg/day for 3 days<br>MQ: 440mg/day for 3 days<br>AS: 200mg/day for 3 days<br>SP: 1500+75mg single dose on day1                                                                            |

Additional file 3 continued.

| Study Country Study year                                        | Study design Treatment: N                                                                                      | Trimester | Efficacy endpoint reported                                                               | Intermittent preventive treatment       | Dosing of treatment                                                                                                                                                                                                                                                                                                                                                                                                                                                                                                                                                        |
|-----------------------------------------------------------------|----------------------------------------------------------------------------------------------------------------|-----------|------------------------------------------------------------------------------------------|-----------------------------------------|----------------------------------------------------------------------------------------------------------------------------------------------------------------------------------------------------------------------------------------------------------------------------------------------------------------------------------------------------------------------------------------------------------------------------------------------------------------------------------------------------------------------------------------------------------------------------|
| NCT01054248<br>Thailand<br>2010-2016<br>[57] (registered trial) | RCT<br>AL4 (335)<br>ASMQ (335)<br>DP (335)<br>*Planned number of participants including vivax malaria patients | 2,3       | Cure rate on day 63 or until delivery<br>Gametocyte carriage<br>Placental malaria        | Not applicable (not Sub-Saharan Africa) | AL(Coartem): (100+600mg) x 2 times/day for 4 days (at 0, 8, 24, 36, 48, 60, 72 and 84 hours) with 100mL chocolate milk<br>AS(Guillin Factory no.1, 50mg/tablet): 4mg/kg/day for 3 days (rounded to the nearest quarter tablet)<br>MQ(Mequin, 250mg/tablet): 8mg/kg/day for 3 days (rounded to the nearest quarter tablet)<br>ASMQ(Farmanguinhos: 100+220mg/tablet): 2 tablets/day for 3 days (if this fixed combination is available)<br>DP (Holley-Cotec:40+320mmg/tablet): (2.4 mg/kg DHA and 20 mg/kg PPQ) x 1 time/day for 3 days (rounded to the nearest half tablet) |
| McGready, 2003a<br>Thailand<br>2000-2001<br>[58]                | PK<br>AAP: 24                                                                                                  | 2,3       | Cure rate on day 28<br>Fever clearance by 48h<br>Parasite clearance time                 | Not applicable (not Sub-Saharan Africa) | AS (Guilin): 4mg/kg/day for 3 days (50mg tablet)<br>AP (Malarone): (atovaquone 20 mg/kg/day and 8 mg/kg/d) for 3 days (250+100mg tablet)<br>With 200mL of chocolate milk (8% fat)                                                                                                                                                                                                                                                                                                                                                                                          |
| Adam, 2012<br>Sudan<br>2007-2008<br>[59]                        | PK study<br>DP: 12<br>(control: 12 matched non-pregnant women)                                                 | 2,3       | Cure rate on day 63<br>Fever clearance within 2 days<br>Parasite clearance within 2 days | Information not available               | DHA/PQ-phosphate (DuoCotecxin): 2.4 mg of DHA/kg/day and 20 mg of PQ (as phosphate)/kg/day rounded to the nearest half tablet for 3 days                                                                                                                                                                                                                                                                                                                                                                                                                                   |
| Onyamboko, 2011<br>DRC<br>2007-2008<br>[60]                     | PK<br>ASSP: 24<br>(control: 14 non-pregnant women)                                                             | 2,3       | Recurrence within 28 days<br>Parasite clearance by 12 h                                  | Information not available               | AS (Guilin): 200mg once<br>SP: 1725mg 24 hours after AS administration                                                                                                                                                                                                                                                                                                                                                                                                                                                                                                     |

## Additional file 3 continued.

| Study Country Study year                                     | Study design Treatment: N                                          | Trimester | Efficacy endpoint reported                                                                   | Intermittent preventive treatment          | Dosing of treatment                                                                                                                                                                                                                |
|--------------------------------------------------------------|--------------------------------------------------------------------|-----------|----------------------------------------------------------------------------------------------|--------------------------------------------|------------------------------------------------------------------------------------------------------------------------------------------------------------------------------------------------------------------------------------|
| McGready, 2012<br>Thailand<br>2008-2009<br>[61]              | PK<br>AS: 20                                                       | 2,3       | Cumulative cure rate on day 63<br>Fever clearance time<br>Parasite clearance time            | Not applicable<br>(not Sub-Saharan Africa) | Group 1: intravenous AS (Guilin) 4mg/kg on day 0 followed by oral AS 4mg/kg for 6 days<br>Group 2: oral AS (Guilin) 4mg/kg on day 0 followed by intravenous AS 4mg/kg on day 1 followed by oral artesunate 4mg/kg daily for 5 days |
| Rijken, 2011<br>Thailand<br>2008<br>[62]                     | PK<br>DP: 24<br>(control: 24<br>matched non-<br>pregnant<br>women) | 2,3       | Cumulative cure rate on day 63<br>Fever clearance<br>Parasite clearance<br>Placental malaria | Not applicable<br>(not Sub-Saharan Africa) | DP (Holley Pharm)<br>Total dosing of 6.5 mg/kg DHA and 51.2mg/kg PPQ over 3 days<br>The tablets (40+320mg) were divided to the nearest quarter                                                                                     |
| Valea, 2014<br>Burkina Faso<br>2008-2009<br>[63]             | PK<br>ASMQ: 24<br>(control: 24<br>non-pregnant<br>women)           | 2,3       | Cure rate on day 63<br>Parasite clearance on day 3                                           | IPTp-SP x 2                                | ASMQ (Farmanguinhos)<br>AS: 3.6mg/kg x 1 time/day for 3 days<br>MQ: 8mg/kg x 1 time/day for 3 days<br>(<50kg: 150+330mg/day<br>50-60kg: 200+440mg/day<br>>60kg: 250+550mg/day)                                                     |
| Juma, 2014<br>Kenia<br>2012<br>[64] (conference<br>abstract) | PK<br>AL: 45<br>(control: 25<br>non-pregnant<br>women)             | 2,3       | Treatment response on day 28                                                                 | Information not available                  | AL: (80+480mg) x 2 times/day for 3 days<br>(at hours 0, 8, 24, 36, 48 and 60)                                                                                                                                                      |
| Mosha, 2014<br>Tanzania<br>2012<br>[65]                      | PK<br>AL: 33                                                       | 2,3       | Cure rate / recurrence rate on day 42<br>Number of recrudescence                             | Information not available                  | AL (Coartem): (80+480mg) x 2 times/day for 3 days<br>(at 0, 8, 24, 36, 48 and 60 h)<br>With 200mL of milk containing 4.5g of fat                                                                                                   |
| Nyunt, 2016<br>Uganda<br>2013-2014<br>[66]                   | PK<br>AL: 30<br>(control: 30<br>non pregnant<br>adults)            | 2,3       | Cure rate / recurrence rate on day 42<br>Parasite clearance on day 2                         | SP x 2 (16-24w,<br>28-36 weeks)            | AL (Coartem): (80+480mg) x 2 times/day for 3 days<br>With 200mL milk                                                                                                                                                               |

Additional file 3 continued.

| <b>Study Country Study year</b>                           | <b>Study design Treatment: N</b> | <b>Trimester</b> | <b>Efficacy endpoint reported</b>                                                                                  | <b>Intermittent preventive treatment</b> | <b>Dosing of treatment</b>                                                                                           |
|-----------------------------------------------------------|----------------------------------|------------------|--------------------------------------------------------------------------------------------------------------------|------------------------------------------|----------------------------------------------------------------------------------------------------------------------|
| Mutagonda, 2017 Tanzania 2014-2015 [67, 68]               | PK<br>AL: 92                     | 2,3              | Cure rate / recurrence rate on day 28<br>(Cumulative cure rate on day 28 was reported in sub-cohort [66])          | Information not available                | AL (Coartem): (80+480mg) x 2 times/day for 3 days (at 0, 8, 24, 36, 48 and 60 h)<br>With milk containing 4.5g of fat |
| Adam, 2004b Sudan 2000-2002 [69]                          | Single-arm<br>Q: 26              | 1                | Cure rate on day 28<br>Fever clearance within 3 days<br>Parasite clearance within 3 days                           | Information not available                | Q: 30 mg salt/kg/day for 7 days<br>Quinine was administered intravenously until patients could tolerate              |
| Adam, 2004c Sudan 1997-2001 [70]                          | Single-arm<br>AM im: 28          | 1,2,3            | Number of recurrence<br>Parasite clearance on day 7                                                                | Information not available                | AM(Kunming): given intramuscularly, 80mg initially then 80mg after 12 h, then 80mg daily (total 480 mg)              |
| Adegnika, 2005 Gabon 2003-2004 [71]                       | Single-arm<br>Q: 50              | 2,3              | Cure rate on day 28<br>Cure rate on day 56<br>Prevalence of placental malaria                                      | Information not available                | Q:10 mg salt/kg x 3 times/day for 7 days rounded to the nearest half tablet of 300mg quinine                         |
| Adam, 2006 Sudan 2004-2005 [72]                           | Single-arm<br>ASSP: 32           | 2,3              | Cure rate on day 28<br>Fever clearance within 2 days<br>Parasite clearance within 2 days                           | Information not available                | AS: 200mg/day for 3 days on days 0—2<br>SP: 1500+75mg given as a single dose on day 0                                |
| Ndiaye, 2011 Senegal 2009-2011 [73] (conference abstract) | Single-arm<br>ASAQ: 28           | 2,3              | Recurrence rate within 42 days<br>Parasite clearance<br>Fever clearance<br>Placental malaria<br>Congenital malaria | Information not available                | ASAQ (Coarsucam)<br>AS: 200mg/day for 3 days<br>AQ: 540mg/day for 3 days                                             |

Additional file 3 continued.

| <b>Study Country Study year</b>                  | <b>Study design Treatment: N</b>                                                         | <b>Trimester</b> | <b>Efficacy endpoint reported</b>                                                                                                                              | <b>Intermittent preventive treatment</b>      | <b>Dosing of treatment</b>                                                                                                                                                                                                                                                                                                                                                                                                                                   |
|--------------------------------------------------|------------------------------------------------------------------------------------------|------------------|----------------------------------------------------------------------------------------------------------------------------------------------------------------|-----------------------------------------------|--------------------------------------------------------------------------------------------------------------------------------------------------------------------------------------------------------------------------------------------------------------------------------------------------------------------------------------------------------------------------------------------------------------------------------------------------------------|
| Iribhogbe, 2017b<br>Nigeria<br>2013-2014<br>[74] | Single-arm<br>ASAQ: 50                                                                   | 2,3              | Recurrence within 28 days                                                                                                                                      | INA                                           | AS: 4mg/kg/day for 3 days<br>AQ: 10mg/kg/day for 3 days                                                                                                                                                                                                                                                                                                                                                                                                      |
| McGready, 1998a<br>Thailand<br>1992-1996<br>[75] | Observational<br>cohort<br>AS: 61<br>AMMQ: 3<br>ASMQ: 26                                 | 1,2,3            | Recurrence within 28 days<br>Parasite clearance on day 7<br>Gametocyte carriage                                                                                | Not applicable<br>(not Sub-Saharan<br>Africa) | AS (Guilin): 4 mg/kg on day 0, 2 mg/kg on days 1 and 2,<br>and 1 mg/kg on days 3-6 (total dose of 12 mg/kg) or 4<br>mg/kg/day for 3 days<br>Mefloquine (Laham): 25 mg/kg, usually as a split regimen<br>on days 5 and 6, was added when there had been no<br>previous intake of mefloquine during the pregnancy<br>AM (Kunming): a total dose of 12 mg/kg over 3 or 5 d. AM<br>was given intramuscularly if the patient could not tolerate<br>oral treatment |
| McGready, 1998b<br>Thailand<br>1991-1996<br>[76] | Observational<br>cohort<br>Q<br>Primary<br>treatment: 113<br>Retreatment: 91             | 1,2,3            | Recurrence within 42 days<br>Parasite clearance on day 3<br>Fever clearance at 48h<br>Gametocyte carriage                                                      | Not applicable<br>(not Sub-Saharan<br>Africa) | Q: 30 mg salt/kg/day for 7 days                                                                                                                                                                                                                                                                                                                                                                                                                              |
| McGready, 2001b<br>Thailand<br>1992-2000<br>[77] | Observational<br>cohort<br>artemisinins<br>Primary<br>treatment: 229<br>Retreatment: 310 | 1,2,3            | Cumulative recurrence rate within 42 days<br>Proportion of recurrence within 42 days<br>Fever clearance time<br>Parasite clearance time<br>Gametocyte carriage | Not applicable<br>(not Sub-Saharan<br>Africa) | AS (Guilin): 12-14mg/kg in total over 3 or 7 days<br>MQ (Lariam): 25 mg base/kg given over 2 days<br>AP (Malarone): (atovaquone 20 mg/kg/day and 8<br>mg/kg/d) for 3 days                                                                                                                                                                                                                                                                                    |



Additional file 3 continued.

| Study Country Study year                                      | Study design Treatment: N                                                                                                                    | Trimester | Efficacy endpoint reported                                                                                                   | Intermittent preventive treatment       | Dosing of treatment                                                                                                                                                                                                                                                                                                                                                                                                                                              |
|---------------------------------------------------------------|----------------------------------------------------------------------------------------------------------------------------------------------|-----------|------------------------------------------------------------------------------------------------------------------------------|-----------------------------------------|------------------------------------------------------------------------------------------------------------------------------------------------------------------------------------------------------------------------------------------------------------------------------------------------------------------------------------------------------------------------------------------------------------------------------------------------------------------|
| Laochan, 2015 Thailand 1994-2009 [78]                         | collation of an observational cohort and interventional studies‡<br>AS: 151, AAP: 11, AC: 143, AL: 43, ASMQ: 5, DP 29, Q: 476, QC: 29 MQ: 22 | 1,2,3     | Description of recurrent episodes of malaria with PCR                                                                        | Not applicable (not Sub-Saharan Africa) | Q: 10 mg salt/kg x 3 times/day for 7 days<br>AS (Guilin): 2 mg/kg x 1 time/day for 7 days (total dose 10–16 mg/kg)<br>AS (Guilin): 4mg/kg x 1 time/day for 3 days<br>AL (Coartem): (80+480mg) x 2 times/day for 3 days<br>MQ: 25 mg/kg stat dose or over two days<br>DP (Duo-Cotexcin): DHA 3 mg/kg, PPQ 15–17 mg/kg x 1 time/day for 3 days<br>AP (Malarone): (atovaquone 20 mg/kg/day and 8 mg/kg/d) for 3 days<br>Clindamycin: 300mg x 3 times/day for 7 days |
| McGready, 2002 Thailand 1995-2000 [79]                        | observational Q novel: 25 retreatment: 209                                                                                                   | 1         | Recurrence within 28 days<br>Fever clearance<br>Parasite clearance<br>Gametocyte carriage                                    | Not applicable (not Sub-Saharan Africa) | Q: 30 mg salt/kg/day for 7 days                                                                                                                                                                                                                                                                                                                                                                                                                                  |
| McGready, 2003b Thailand 1999-2001 [80]                       | Observational cohort AAP: 27                                                                                                                 | 1,2,3     | Recrudescence within day 42<br>Fever clearance by 48h<br>Parasite clearance time<br>Gametocyte carriage<br>Placental malaria | Not applicable (not Sub-Saharan Africa) | AS: 4mg/kg/day for 3 days or 2mg/kg/day for 7 days (with a loading dose of 4 mg/kg in hyperparasitaemic patients with >4%)<br>AP: (atovaquone 20 mg/kg/day and 8 mg/kg/d) for 3 days                                                                                                                                                                                                                                                                             |
| Villegas, 2005 Venezuela 2002-2005 [81] (conference abstract) | Observational cohort ASMQ: 27                                                                                                                | INA       | INA (efficacy)                                                                                                               | Not applicable (not Sub-Saharan Africa) | ASMQ for 2-3 days                                                                                                                                                                                                                                                                                                                                                                                                                                                |
| Rijken, 2008 Thailand 2006-2007 [82]                          | Observational cohort DP: 62                                                                                                                  | 1,2,3     | Cumulative cure rate by day 63<br>Fever clearance on day 2<br>Parasite clearance time                                        | Not applicable (not Sub-Saharan Africa) | DP (Holley Pharm)<br>Total dosing of 6.5 mg/kg DHA and 51.2mg/kg PPQ over 3 days (40+320mg tablet)                                                                                                                                                                                                                                                                                                                                                               |

Additional file 3 continued.

| Study<br>Country<br>Study year                                       | Study design<br>Treatment: N                       | Trimester | Efficacy endpoint reported                                                                                                            | Intermittent<br>preventive<br>treatment | Dosing of treatment                                                                        |
|----------------------------------------------------------------------|----------------------------------------------------|-----------|---------------------------------------------------------------------------------------------------------------------------------------|-----------------------------------------|--------------------------------------------------------------------------------------------|
| Rulisa, 2012<br>Rwanda<br>2007-2009<br>[83]                          | Observational<br>cohort<br>AL: (1072) <sup>†</sup> | 1,2,3     | Cure rate on day 56<br>Recurrence within 56 days                                                                                      | 23.4% received<br>IPTp-SP               | Rwanda National Guideline                                                                  |
| Kalilani, 2013 and<br>Cohee, 2016<br>Malawi<br>2009-2010<br>[84, 85] | Observational<br>cohort<br>AL: 56                  | 1,2       | Recrudescence rate by delivery<br>Placental malaria<br>Temporal relationship between peripheral<br>parasitaemia and placental malaria | IPTp-SP x 3                             | AL: (80+480mg) x 2 times/day for 3 days<br>(at 0h, 8h, day2 AM, day2 PM, day3 AM, day3 PM) |

AAP: artesunate-atovaquone-proguanil, AC: artesunate-clindamycin, AL: artemether-lumefantrine, AQ: amodiaquine, AS: artesunate, CD: chlorproguanil-Dapsone, CHQ: chloroquine, DP: dihydroartemisinin(DHA)-piperazine(PPQ), DRC: Democratic Republic of Congo, ECG: electrocardiography, INA: information not available, MQ: mefloquine, N: number of pregnant women included, PCR: polymerase chain reaction, PK: pharmacokinetic study, Q: quinine, QC: quinine-clindamycin, RCT: randomised controlled trial, SP: sulfadoxine-pyrimethamine. \*Planned number of participants in clinical trial registry. NCT01054248 includes P. vivax patients. <sup>†</sup> This number includes patients without parasitological confirmation. The exact number of parasitologically confirmed patients is not known. <sup>‡</sup> This study included patients enrolled in other studies [40-42, 45, 58, 61, 61, 80, 82].
