# Supplementary material for: Systematic literature review and meta-analysis of the efficacy of artemisinin-based and quinine-based treatments for uncomplicated falciparum malaria in pregnancy: methodological challenges
Source: Springer Nature journal article supplement (doi:10.1186/s12936-017-2135-y), 2017-12-01
Supplement: MOESM4 [file 15304954]

Additional file 4. Summary of the quality of studies

| Study [reference]           | Study design | Randomisation                                                                                  | Allocation concealment                               | Blinding                                                             | Loss to follow-up for efficacy assessment                    |
|-----------------------------|--------------|------------------------------------------------------------------------------------------------|------------------------------------------------------|----------------------------------------------------------------------|--------------------------------------------------------------|
| Naing, 1988 [36]            | RCT          | Unclear: 'Patients were randomised [...] depending on clinical severity and parasite density.' | Unclear                                              | Unclear                                                              | Unclear                                                      |
| Harinasuta, 1990 [37]*      | RCT          | INA                                                                                            | INA                                                  | INA                                                                  | 0/82 (Q)<br>0/85 (MQ)                                        |
| Nosten, 1993 [23]           | RCT          | Yes, but the method is not specified.                                                          | Unclear                                              | At least patients were blinded by using identical placebo.           | 11/43 were dropped out.                                      |
| Sowunmi, 1998 [38]          | RCT          | Yes, but the method is not specified.                                                          | Unclear                                              | Unclear                                                              | Unclear                                                      |
| Bounyasong, 2001 [39]       | RCT          | Yes, but the method is not specified.                                                          | Unclear                                              | Unclear                                                              | 1/30 (Q)<br>2/30 (ASSP)                                      |
| McGready, 2000 [40]         | RCT          | Block randomisation                                                                            | Unclear                                              | Open-label                                                           | 0/66 (ASMQ)<br>0/42 (Q)                                      |
| McGready, 2001a [41]        | RCT          | Block randomisation                                                                            | Unclear                                              | Open-label                                                           | 19/65 (QC)<br>17/64 (AS)                                     |
| McGready, 2005 [42]         | RCT          | Computer-generated block randomisation                                                         | Sealed envelope                                      | Open-label                                                           | 0/39 (AAP)<br>0/42 (Q)                                       |
| Adam, 2004a [43]            | RCT          | Yes, but the method is not specified.                                                          | Unclear                                              | Unclear                                                              | 7/25 (20mg/kg/day)<br>2/26 (30mg/kg/day)                     |
| Kalilani, 2007 [44]         | RCT          | Block randomisation                                                                            | Sealed envelope                                      | Open-label<br>Lab technicians were blinded.                          | 8/47 (ASSP)<br>7/47 (SP)<br>5/47 (SP + azithromycin)         |
| McGready, 2008 [45]         | RCT          | Block randomisation                                                                            | Sealed envelope                                      | Open-label<br>Lab technicians and patient examiners were blinded.    | 5/125 (AL)<br>3/125 (AS)                                     |
| Mutabingwa, 2009 [46]       | RCT          | Block randomisation                                                                            | Sealed envelope                                      | Open-label<br>Microscopists were blinded.                            | 8/83 (ASAQ)<br>8/80 (AQSP)<br>4/81 (CD)<br>2/28 (SP)         |
| Kaye, 2008 [47]             | RCT          | Computer-generated random number                                                               | Sealed envelope                                      | Open-label                                                           | 5/57 (AL)<br>5/57 (CD)                                       |
| Piola, 2010 [48]            | RCT          | Computer-generated permuted block of eight                                                     | Sealed envelope                                      | Open-label<br>Microscopists and clinical investigators were blinded. | 10/152 (Q)<br>6/152 (AL)                                     |
| Carmona-Fonseca, 2013 [49]  | RCT          | Ballot system                                                                                  | Yes                                                  | Unclear                                                              | 0/15 (AL)<br>0/15 (ASMQ)                                     |
| D'Alessandro, 2016 [50, 51] | RCT          | Block randomisation                                                                            | Sealed envelope                                      | Open-label<br>Lab technicians (interpretation of PCR) were blinded.  | 50/880 (AL)<br>51/842 (ASAQ)<br>94/853 (DP)<br>77/848 (ASMQ) |
| Osarfo, 2017 [52]           | RCT          | Computer-generated random number                                                               | Sealed envelope                                      | Open-label.<br>Microscopists were blinded.                           | 24/206 (ASAQ)<br>18/212 (DP)                                 |
| Onyamboko, 2015 [53]*       | RCT          | Yes, but the method is not specified.                                                          | INA                                                  | Open-label                                                           | INA                                                          |
| Ukah, 2015 [54]             | RCT          | Computer-generated                                                                             | Only pharmacy had access to the allocation sequence. | Double blind                                                         | 3/75 (AL)<br>7/75 (ASAQ)                                     |

Additional file 4 continued.

| Study [reference]          | Study design                                                                | Randomisation                           | Allocation concealment | Blinding                                  | Loss to follow-up for efficacy assessment |
|----------------------------|-----------------------------------------------------------------------------|-----------------------------------------|------------------------|-------------------------------------------|-------------------------------------------|
| Iribhogbe, 2017a [55]      | RCT                                                                         | Balloting                               | Unclear                | Open-label                                | 2/40 (AL)<br>3/40 (ASAQ)                  |
| CTRI/2009/091/001055 [56]* | RCT                                                                         | Yes, but the method is not specified.   | INA                    | INA                                       | INA                                       |
| NCT01054248 [57]*          | RCT                                                                         | Computer generated permuted block of 15 | sealed envelope        | Open-label<br>Microscopists were blinded. | INA                                       |
| McGready, 2003a [58]       | PK study                                                                    | Not applicable                          | Not applicable         | Unclear                                   | 8/24                                      |
| Adam, 2012 [59]            | PK study                                                                    | Not applicable                          | Not applicable         | Unclear                                   | 0/12                                      |
| Onyamboko, 2011 [60]       | PK study                                                                    | Not applicable                          | Not applicable         | Unclear                                   | 0/26                                      |
| McGready, 2012 [61]        | PK study                                                                    | No: assigned alternatively              | Not applicable         | Unclear                                   | 0/20                                      |
| Rijken, 2011 [62]          | PK study                                                                    | Not applicable                          | Not applicable         | Unclear                                   | 2/24 (delivery)                           |
| Valea, 2014 [63]           | PK study                                                                    | Not applicable                          | Not applicable         | Unclear                                   | 1/25                                      |
| Juma, 2014 [64]            | PK study                                                                    | Not applicable                          | Not applicable         | Open-label                                | INA                                       |
| Mosha, 2014 [65]           | PK study                                                                    | Not applicable                          | Not applicable         | Unclear                                   | 0/33                                      |
| Nyunt, 2016 [66]           | PK study                                                                    | Not applicable                          | Not applicable         | No                                        |                                           |
| Mutagonda, 2017 [67, 68]   | PK study                                                                    | Not applicable                          | Not applicable         | Unclear                                   | 10/92                                     |
| Adam, 2004b [69]           | Single-arm                                                                  | Not applicable                          | Not applicable         | Unclear                                   | 0/26                                      |
| Adam, 2004c [70]           | Single-arm                                                                  | Not applicable                          | Not applicable         | Unclear                                   | 0/28                                      |
| Adegnika, 2005 [71]        | Single-arm                                                                  | Not applicable                          | Not applicable         | Unclear                                   | 0/50 (day 28)<br>9/50 (day 56)            |
| Adam, 2006 [72]            | Single-arm                                                                  | Not applicable                          | Not applicable         | Unclear                                   | 0/36                                      |
| Ndiaye, 2011 [73]*         | Single-arm                                                                  | Not applicable                          | Not applicable         | Open-label                                | 0/28                                      |
| Iribhogbe, 2017b [74]      | Single-arm                                                                  | Not applicable                          | Not applicable         | Open-label                                | 8/50                                      |
| McGready, 1998a [75]       | Observational cohort                                                        | Not applicable                          | Not applicable         | Unclear                                   | 5/83 (all)                                |
| McGready, 1998b [76]       | Observational cohort                                                        | Not applicable                          | Not applicable         | Unclear                                   | Unclear                                   |
| McGready, 2001b [77]       | Observational cohort                                                        | Not applicable                          | Not applicable         | Unclear                                   | Unclear                                   |
| Laochan, 2015 [78]         | Collation of observational cohorts and RCTs [40-42, 45, 58, 61, 61, 80, 82] | refer to each study                     | refer to each study    | refer to each study                       | refer to each study                       |
| McGready, 2002 [79]        | Observational cohort                                                        | Not applicable                          | Not applicable         | Unclear                                   | Unclear                                   |
| McGready, 2003b [80]       | Observational cohort                                                        | Not applicable                          | Not applicable         | Unclear                                   | 6/27                                      |
| Villegas, 2005 [81]*       | Observational cohort                                                        | Not applicable                          | Not applicable         | INA                                       | INA                                       |
| Rijken, 2008 [82]          | Observational cohort                                                        | Not applicable                          | Not applicable         | Unclear                                   | 5/50 (delivery)                           |
| Rulisa, 2012 [83]          | Observational cohort                                                        | Not applicable                          | Not applicable         | Unclear                                   | Unclear                                   |
| Kalilani, 2013 [84, 85]    | Observational cohort                                                        | Not applicable                          | Not applicable         | Unclear                                   | INA                                       |

AAP: artesunate-atovaquone-proguanil, AL: artemether-lumefantrine, AQ: amodiaquine, AS: artesunate, CD: chlorproguanil-Dapsone, DP: dihydroartemisinin-piperazine, INA: information not available (conference abstract or registered trial). MQ: mefloquine, PK: pharmacokinetic, Q: quinine, QC: quinine-clindamycin, RCT: randomised controlled trial, SP: sulfadoxine-pyrimethamine. \* conference abstract or registered trial.
