# Supplementary material for: Systematic literature review and meta-analysis of the efficacy of artemisinin-based and quinine-based treatments for uncomplicated falciparum malaria in pregnancy: methodological challenges
Source: Springer Nature journal article supplement (doi:10.1186/s12936-017-2135-y), 2017-12-01
Supplement: MOESM6 [file 15304954]

|      | Q     | QC | AS    | AM | AL    | ASAQ  | ASMQ  | DP    | AAP | AC | ASSP  | AMMQ |
|------|-------|----|-------|----|-------|-------|-------|-------|-----|----|-------|------|
| Q    | 2 (8) |    |       |    | 1     |       | 2     |       | 1   |    |       |      |
| QC   |       |    | 1     |    |       |       |       |       |     |    |       |      |
| AS   |       |    | 1 (1) |    | 1     |       |       |       |     |    |       |      |
| AM   |       |    |       | 1  |       |       |       |       |     |    |       | (1)  |
| AL   |       |    |       |    | 7 (1) | 1 (2) | 2 [1] | 1 [1] |     |    |       |      |
| ASAQ |       |    |       |    |       | 2 (1) | 1     | 1 (1) |     |    |       |      |
| ASMQ |       |    |       |    |       |       | 1 (2) | 1 [1] |     |    | [1]   |      |
| DP   |       |    |       |    |       |       |       | 3     |     |    |       |      |
| AAP  |       |    |       |    |       |       |       |       | 2   |    |       |      |
| AC   |       |    |       |    |       |       |       |       |     |    |       |      |
| ASSP |       |    |       |    |       |       |       |       |     |    | 2 (1) |      |
| AMMQ |       |    |       |    |       |       |       |       |     |    |       | (1)  |

Additional file 6. The number of study arms with PCR-corrected outcomes for each comparison of drugs. The number of studies in which PCR-corrected outcomes were not available is shown in round brackets. The number of unpublished registered trials is shown in square brackets. The numbers of non-comparative studies were shown on the diagonal. Two observational studies which include more than five treatment groups (McGready, 2001b [77] and Laochan, 2015 [78]) were excluded from this figure. AAP: artesunate + atovaquone-proguanil, AC: artesunate + clindamycin, AL: artemether-lumefantrine, AM: artemether, AS: artesunate, AQ: amodiaquine, MQ: mefloquine, SP: sulfadoxine-pyrimethamine, DP: dihydroartemisinin-piperaquine, Q: quinine, QC: quinine + clindamycin.
