# Supplementary material for: Systematic literature review and meta-analysis of the efficacy of artemisinin-based and quinine-based treatments for uncomplicated falciparum malaria in pregnancy: methodological challenges
Source: Springer Nature journal article supplement (doi:10.1186/s12936-017-2135-y), 2017-12-01
Supplement: MOESM7 [file 15304954]

Additional file 7. Background information of patients at inclusion.

| Study [reference]     | Treatment group | N  | Age (year)            | Weight (kg)             | Gestational age at malaria (week)              | Gravidity | Parity                                   | Parasitaemia (/μL)      | Haemoglobin (g/dL)            | Body temperature (°C)     | Note                                                                   |
|-----------------------|-----------------|----|-----------------------|-------------------------|------------------------------------------------|-----------|------------------------------------------|-------------------------|-------------------------------|---------------------------|------------------------------------------------------------------------|
| Naing, 1988 [36]      | Q               | 23 | 26.7 ± 1.2            | NA                      | 2nd tri (50%)<br>3rd tri (50%)                 | NA        | 0 (41%)<br>1–3 (31%)<br>≥4 (29%)         | Log mean 4.3 ± 0.3      | NA                            | NA                        | Gestational age and parity includes patients treated with amodiaquine. |
| Harinasuta, 1990 [37] | Q               | 82 | NA                    | NA                      | 1st tri (9%)<br>2nd tri (59%)<br>3rd tri (33%) | NA        | NA                                       | NA                      | NA                            | NA                        | Conference abstract                                                    |
| Nosten, 1993 [23]     | Q5              | 16 | 28 ± 6.8              | 48 ± 5.1                | 19.3 ± 6.5                                     | NA        | 4*                                       | 631‡<br>(91–8256)       | Hct 26 ± 4 %                  | NA                        |                                                                        |
|                       | Q5+spiramycin   | 16 | 26 ± 6.2              | 49 ± 5.5                | 21.7 ± 9                                       |           | 2*                                       | 537‡<br>(53–5512)       | Hct 28 ± 5 %                  |                           |                                                                        |
| Sowunmi, 1998 [38]    | AM              | 23 | 29.9 ± 6.1<br>(21–41) | 63.9 ± 12.1<br>(50–119) | NA                                             | NA        | 0 (65%)<br>1 (13%)<br>2 (9%)<br>≥3 (13%) | 29719‡<br>(1674–250138) | Anaemia <sup>a</sup> 30%      | 38.1 ± 0.2<br>(37.5–39.0) |                                                                        |
|                       | AM-MQ           | 22 | 28.9 ± 5.1<br>(20–40) | 64.1 ± 11.9<br>(53–121) |                                                |           | 0 (64%)<br>1 (18%)<br>2 (5%)<br>≥3 (14%) | 28044‡<br>(2001–199992) | Anaemia <sup>a</sup> 30%      | 38.1 ± 0.1<br>(36.7–39.3) |                                                                        |
| Bounyasong, 2001 [39] | Q               | 29 | 27.2                  | 58.7                    | 27.4                                           | NA        | 1.6                                      | 1313.35 /200WBC         | Hct 35.2 %                    | NA                        | Body weight before pregnancy.                                          |
|                       | ASMQ            | 28 | 26.1                  | 57.1                    | 26.7                                           |           | 1.4                                      | 1329.68 /200WBC         | Hct 34.3 %                    |                           |                                                                        |
| McGready, 2000 [40]   | ASMQ            | 66 | 24* (15–37)           | 48* (36–68)             | 24* (12–40)                                    | NA        | 1 (27%)<br>1 (29%)                       | 11651‡<br>(32–241127)   | Hct 29.4*<br>(17.5–39.0) %    | Fever 15%                 |                                                                        |
|                       | Q               | 42 | 23* (16–36)           | 50* (41–67)             | 24* (15–38)                                    |           |                                          | 19086‡<br>(79–149389)   | Hct 28.7*<br>(21.0–37.2) %    | Fever 21%                 |                                                                        |
| McGready, 2001a [41]  | QC              | 65 | 25* (15–41)           | 49*<br>(40–64)          | 26* (16–40)<br>28* (16–40)                     | NA        | 1 (26%)<br>1 (27%)                       | 11099‡<br>(16–93019)    | Hct 29.2*<br>(14.9–38.5) %    | Fever 22%                 |                                                                        |
|                       | AS              | 64 | 24* (15–41)           | 49*<br>(39–74)          |                                                |           |                                          | 9822‡<br>(16–109724)    | Hct 29.6*<br>(20.0–38.9) %    | Fever 14%                 |                                                                        |
| McGready, 2005 [42]   | Q               | 42 | 26 ± 7<br>(16–39)     | 50 ± 7<br>(30–68)       | 21 ± 4.5<br>(14.9–30.2)                        | 1 (26%)   | NA                                       | 2084‡<br>(33–109648)    | Anaemia <sup>a</sup><br>45.2% | Fever 74%                 | History of fever.                                                      |
|                       | AAP             | 39 | 26 ± 6<br>(16–37)     | 49 ± 7<br>(40–69)       | 21 ± 5.3<br>(10.1–36.2)                        | 1 (31%)   |                                          | 2596‡<br>(33–123027)    | Anaemia <sup>a</sup><br>38.5% | Fever 59%                 |                                                                        |
| Adam, 2004a [43]      | Q 20mg/kg/d     | 18 | 25.2 ± 6.0            | 59.3 ± 15.9             | 26.1 ± 9.9                                     | NA        | 2.6 ± 1.9                                | 5837 ± 8361             | 8.9 ± 0.6                     | 38.1 ± 0.9                |                                                                        |
|                       | Q 30mg/kg/d     | 24 | 25.5 ± 1.9            | 52.2 ± 9.3              | 26.1 ± 8.9                                     |           | 2.6 ± 2.2                                | 4207 ± 12325            | 8.6 ± 0.9                     | 37.8 ± 1.0                |                                                                        |

Additional file 7 continued.

| Study [reference]          | Treatment group | N   | Age (year)     | Weight (kg)    | Gestational age at malaria (week)  | Gravidity                            | Parity                         | Parasitaemia (/μL)    | Haemoglobin (g/dL)  | Body temperature (°C) | Note                                                                                       |
|----------------------------|-----------------|-----|----------------|----------------|------------------------------------|--------------------------------------|--------------------------------|-----------------------|---------------------|-----------------------|--------------------------------------------------------------------------------------------|
| Kalilani, 2007 [44]        | ASSP            | 47  | 20* [17–24]    | 52.9 ± 5.9     | 22* [20–26]                        | 1 (60%)<br>2 (9%)<br>≥3 (32%)        | NA                             | 686.6‡ (120–4260)     | 10.5 ± 1.6          | Fever 4%              | Summary of all 47 enrolled patients. 7 HIV-positive cases.                                 |
| McGready, 2008 [45]        | AL              | 125 | 26 ± 7 (14–42) | 50 ± 6 (35–65) | 23.7 ± 6.8 (13.1–39.2)             | 3* (1–13)                            | 1* (0–9)                       | 3548‡ (65–457088)     | Hct<br>30.0 ± 4.4 % | 36.8 ± 1.0            |                                                                                            |
|                            | AS              | 128 | 27 ± 8 (14–44) | 49 ± 7 (37–71) | 24.8 ± 7.6 (13.1–39.4)             | 3* (1–11)                            | 2* (0–9)                       | 3162‡ (48–158489)     | Hct<br>29.9 ± 5.0 % | 37.0 ± 1.1            |                                                                                            |
| Mutabingwa, 2009 [46]      | AL              | 83  | 21* [19–26]    | NA             | 6* [5–7] months                    | NA                                   | 1 (59%)                        | 181* [62–628] /200WBC | 9.3 ± 1.3           | NA                    | All HIV negative.                                                                          |
| Kaye, 2008 [47]            | AL              | 57  | 23.5 ± 5.29    | NA             | 2nd tri (25.5%)<br>3rd tri (74.5%) | 1 (33%)<br>2 (26%)<br>≥3 (42%)       | NA                             | 24900 ± 3368.2        | NA                  | 36.9                  | Summary of all 57 enrolled patients.                                                       |
| Piola, 2010 [48]           | Q               | 152 | 22.6 (17–38)   | 58 (IQR 10)    | 22.3 (9–38)                        | 2* (1–7)                             | NA                             | 1995‡ (IQR 9771)      | 10.9*               | Fever 20%             |                                                                                            |
|                            | AL              | 152 | 22.5 (15–38)   | 58 (IQR 10)    | 24.7 (10–39)                       | 2* (1–8)                             |                                | 1418‡ (IQR 4727)      | 10.9*               | Fever 23%             |                                                                                            |
| Carmona-Fonseca, 2013 [49] | AL & ASMQ       | 30  | 22.0 ± 6.7     | NA             | 2nd tri (50%)<br>3rd tri (50%)     | NA                                   | 1 (42%)<br>2 (18%)<br>≥3 (40%) | NA                    | 10.6 ± 1.2          | NA                    | Age, parity and haemoglobin are the average of those of 60 P.vivax cases and 30 P.f cases. |
| D’Alessandro, AL 2016 [50] |                 | 880 | 22.6 ± 5.6     | NA             | 2nd tri (71.8%)<br>3rd tri (28.2%) | 1 (36.3%)<br>2 (23.1%)<br>≥3 (40.6%) | NA                             | 800* [213–2880]       | 10.2* [9.2–11.0]    | Fever 6.5%            | Patients taking antiretroviral treatment were not enrolled.                                |
|                            | ASAQ            | 842 | 23.4 ± 5.9     |                | 2nd tri (75.0%)<br>3rd tri (24.9%) | 1 (37.4%)<br>2 (22.2%)<br>≥3 (40.4%) |                                | 569* [165–2025]       | 10.1* [9.1–11.0]    | Fever 6.8%            |                                                                                            |
|                            | DP              | 853 | 22.3 ± 5.4     |                | 2nd tri (68.5%)<br>3rd tri (31.5%) | 1 (40.0%)<br>2 (25.3%)<br>≥3 (34.7%) |                                | 680* [200–2760]       | 10.1* [9.1–11.0]    | Fever 3.2%            |                                                                                            |
|                            | ASMQ            | 848 | 23.5 ± 5.9     |                | 2nd tri (65.8%)<br>3rd tri (34.2%) | 1 (32.7%)<br>2 (23.7%)<br>≥3 (43.6%) |                                | 840* [218–3040]       | 10.1* [9.1–10.9]    | Fever 8.0%            |                                                                                            |

Additional file 7 continued.

| Study [reference]     | Treatment group | N   | Age (year)                                                | Weight (kg)    | Gestational age at malaria (week) | Gravidity                        | Parity    | Parasitaemia (/μL)       | Haemoglobin (g/dL)         | Body temperature (°C) | Note                                                                  |
|-----------------------|-----------------|-----|-----------------------------------------------------------|----------------|-----------------------------------|----------------------------------|-----------|--------------------------|----------------------------|-----------------------|-----------------------------------------------------------------------|
| Osarfo, 2017 [52]     | ASAQ            | 205 | 15-19 (20%),<br>20-24 (27%),<br>25-29 (27%),<br>≥30 (26%) | NA             | 22.3 (95% CI:<br>21.6-22.9)       | 0 (26%),<br>1 (22%),<br>≥2 (51%) | NA        | 238‡<br>(95%CI: 199-285) | 10.1 (95%CI:<br>9.9-10.2)  | Asymptomatic          | Women with positive HIV status were excluded.                         |
|                       | DP              | 212 | 15-19 (14%),<br>20-24 (36%),<br>25-29 (32%),<br>≥30 (18%) |                | 22.7 (95%CI:<br>22.1-23.4)        | 0 (35%),<br>1 (22%),<br>≥2 (43%) |           | 236‡<br>(95%CI: 193-289) | 10.0 (95%CI:<br>9.8-10.2)  |                       |                                                                       |
| Onyamboko, 2015 [53]  | AL3             | 48  | NA                                                        | NA             | NA                                | NA                               | NA        | NA                       | NA                         | NA                    | Conference abstract                                                   |
|                       | AL5             | 48  |                                                           |                |                                   |                                  |           |                          |                            |                       |                                                                       |
| Ukah, 2015 [54]       | ASAQ            | 75  | 29.2 ± 4.8<br>(20–42)                                     | NA             | 28.5 ± 6.8<br>(14–40)             | NA                               | 1* (0–4)  | 13174 ± 12445            | Hct<br>32.3 ± 2.4 %        | Fever 60%             | HIV-positive cases: 1/75 in ASAQ, 5/75 in AL..                        |
|                       | AL              | 75  | 29.4 ± 4.6<br>(18–41)                                     |                | 27.2 ± 7.3<br>(14–40)             |                                  | 0* (0–4)  | 12484 ± 11051            | Hct<br>32.2 ± 2.3 %        | Fever 53%             |                                                                       |
| Iribhogbe, 2017a [55] | AL              | 40  | 31.0 ± 0.5                                                | 68.2 ± 0.3     | 27.9 ± 0.3                        | 3.4 ± 0.7                        | 4.3 ± 0.6 | 4884 ± 386.6             | NA                         | 38.5 ± 0.1            |                                                                       |
|                       | ASAQ            | 40  | 27.2 ± 0.5                                                | 69.0 ± 0.9     | 31.3 ± 0.0                        | 2.9 ± 0.1                        | 3.7 ± 0.1 | 3634 ± 537               |                            | 38.1 ± 0.1            |                                                                       |
| McGready, 2003a [58]  | AAP             | 24  | 20* (16–37)                                               | 50*<br>(39–64) | 28.5*<br>(19.1–35.9)              | 2* (1–7)                         | 1* (0–4)  | 3467‡<br>(33–138038)     | NA                         | 37.6*<br>(36.0–40.0)  |                                                                       |
| Adam, 2012 [59]       | DP              | 12  | 26.2 ± 8.7                                                | 61.3 ± 10.1    | 32.0 (15.0–40.0)                  | NA                               | NA        | 12642‡<br>(1716–89700)   | 9.0 ± 1.0                  | NA                    |                                                                       |
| Onyamboko, 2011 [60]  | ASSP            | 13  | 21.7 ± 2.7                                                | 55.5 ± 8.3     | 22.4 ± 0.8                        | NA                               | 0* (0–1)  |                          | Hct 30.0*<br>[30.0–30.0] % | 36.5*<br>[36.1–36.7]  | All HIV negative. Including 2 women with submicroscopic parasitaemia. |
|                       | EGA 22–26w      | 13  | 26.6 ± 4.4                                                | 63.0 ± 7.2     | 33.2 ± 1.4                        |                                  | 1* (0–4)  | 528*<br>[372–842]        | Hct 32.0*<br>[31.0–33.0] % | 36.4*<br>[36.2–36.5]  |                                                                       |
| McGready, 2012 [61]   | AS (iv on day0) | 10  | 24* (17–40)                                               | 48*<br>(40–59) | 24.8*<br>(17.1–24.2)              | 1* (1–6)<br>4* (1–8)             | 0* (0–5)  | 7933‡<br>(575–63096)     | Hct 30*<br>(25–46) %       | 37.8*<br>(36.0–40.0)  |                                                                       |
|                       | AS (iv on day1) | 10  | 32* (22–40)                                               | 50*<br>(40–64) | 25.5*<br>(14.0–37.4)              |                                  | 2* (0–6)  | 2864 ‡<br>(129–51286)    | Hct 30*<br>(27–34) %       | 37.1*<br>(36.1–39.0)  |                                                                       |
| Rijken, 2011 [62]     | DP              | 24  | 28.1 ± 8.0                                                | 49 ± 6         | 24.6 ± 5.9                        | 3* (1–9)                         | 2* (0–8)  | 7349.06‡<br>(96–176594)  | Hct<br>31.0 ± 4.5 %        | 37.7 ± 0.9            |                                                                       |

Additional file 7 continued.

| Study [reference]     | Treatment group    | N  | Age (year)  | Weight (kg)          | Gestational age at malaria (week) | Gravidity                      | Parity                        | Parasitaemia (/μL)        | Haemoglobin (g/dL)  | Body temperature (°C) | Note                                                                        |
|-----------------------|--------------------|----|-------------|----------------------|-----------------------------------|--------------------------------|-------------------------------|---------------------------|---------------------|-----------------------|-----------------------------------------------------------------------------|
| Valea, 2014 [63]      | ASMQ               | 24 | 23.6 ± 6.1  | 52.0*<br>(46–69.5)   | 2nd tri (50%)<br>3rd tri (50%)    | NA                             | 1 (42%)<br>2 (33%)<br>3 (25%) | 1029‡<br>(95%CI 455–2327) | 9.0 ± 1.1           | 36.9 ± 0.4            |                                                                             |
| Juma, 2014 [64]       | AL                 | 45 | NA          | NA                   | NA                                | NA                             | NA                            | NA                        | NA                  | NA                    | Conference abstract and registry information                                |
| Mosha, 2014 [65]      | AL                 | 33 | 25* (18–41) | 52* (40–80)          | 27* (14–37)                       | NA                             | NA                            | 25280*<br>(560–198080)    | 10.2*<br>(7.1–13.3) | 37.1*<br>(36.0–39)    |                                                                             |
| Nyunt, 2016 [66]      | AL                 | 30 | 25* (18–39) | 59.4*<br>(44.5–81.1) | 28* (14–34)                       | NA                             | NA                            | 13227‡ (95%CI 7728–22639) | 10.5*<br>(7.6–13.1) | NA                    | All HIV negative.                                                           |
| Mutagonda, 2017 [68]  | AL                 | 92 | 23* (15–41) | NA                   | 2nd tri (61%)<br>3rd tri (39%)    | 1 (46%)<br>2 (19%)<br>≥3 (36%) | NA                            | 2700*<br>(400–72500)      | NA                  | NA                    |                                                                             |
| Adam, 2004b [69]      | Q                  | 26 | 26.2 ± 3.5  | 65.8 ± 4.6           | 8.5 ± 0.9                         | NA                             | 2.8 ± 2.6                     | 5856 ± 1652               | 9.2 ± 1.3           | 38.2 ± 0.6            |                                                                             |
| Adam, 2004c [70]      | AM                 | 28 | 27.1 ± 5.8  | 65.8 ± 6.4           | 27 ± 7.3                          | NA                             | 1* (0–8)                      | 8468.54‡<br>(525–35000)   | 8.3 ± 0.9           | 38.6 ± 1.1            |                                                                             |
| Adegnika, 2005 [71]   | Q<br>Recurrence    | 20 | 20 ± 4      | 54 ± 6               | 25.5 ± 5.7                        | 2.2 (1–5)                      | 0.8 (0–3)                     | 2104‡<br>(125–240000)     | 9.0 ± 1.2           | 36.8 ± 0.5            |                                                                             |
|                       | Q<br>No recurrence | 30 | 23 ± 6      | 61 ± 8               | 24.5 ± 6.3                        | 3.2 (1–13)                     | 1.6 (0–9)                     | 695‡<br>(12–19800)        | 9.5 ± 1.1           | 36.8 ± 0.4            |                                                                             |
| Adam, 2006 [72]       | ASSP               | 32 | 29.4 ± 4.3  | 68.7 ± 12.7          | 29.7 ± 8.4                        | NA                             | 3.2 ± 1.8                     | 7762‡<br>(3800–15250)     | 9.8 ± 1.4           | 38.1 ± 0.6            |                                                                             |
| Ndiaye, 2011 [73]     | ASAQ               | 28 | NA          | NA                   | NA                                | NA                             | NA                            | 9.91 ± 1.24‡              | NA                  | NA                    | Conference abstract. Parasitaemia is shown in log scale.                    |
| Iribhogbe, 2017b [74] | ASAQ               | 50 | NA          | NA                   | NA                                | NA                             | NA                            | 5721.3 ± 287.0            | NA                  | 100%                  | Demographic information was shown together with non-malaria pregnant women. |

Additional file 7 continued.

| Study [reference]    | Treatment group                   | N   | Age (year)         | Weight (kg)        | Gestational age at malaria (week) | Gravidity | Parity    | Parasitaemia (/μL)   | Haemoglobin (g/dL)       | Body temperature (°C) | Note                                                                                                                                             |
|----------------------|-----------------------------------|-----|--------------------|--------------------|-----------------------------------|-----------|-----------|----------------------|--------------------------|-----------------------|--------------------------------------------------------------------------------------------------------------------------------------------------|
| McGready, 1998a [75] | Artemisinins                      | 61  | 25 (17–38)         | NA                 | 1st (28%)                         | NA        | NA        | 814*                 | Anaemia 72%              | Fever 16%             | Gestational age was reported for combined group of retreatment and hyperparasitaemia. Percentage of anaemia was reported but without definition. |
|                      | Retreatment                       | 13  |                    |                    | 2nd–3rd (82%)                     |           |           | (16–130385)          | Anaemia 50%              | Fever 23%             |                                                                                                                                                  |
|                      | Hyperparasitaemia Inadvertent use | 16  | 22 (16–32)         |                    | 1st (88%)                         |           |           | 115484* (960–312924) | Anaemia 29%              | Fever 67%             |                                                                                                                                                  |
|                      |                                   |     | 20 (15–40)         |                    | 2nd–3rd (12%)                     |           |           | 20788* (50–394881)   |                          |                       |                                                                                                                                                  |
| McGready, 1998b [76] | Q                                 | 113 | 24.1 ± 5.8         | 47 ± 5.9           | 14.7 ± 7.3                        | 1 (37%)   | NA        | 852‡                 | Hct                      | 36.7 ± 1              | Including multiple episodes from a single patient.                                                                                               |
|                      | Primary treatment                 |     |                    |                    |                                   | 2–3 (31%) |           | (16–2000332)         | 29.5 ± 5.3%              |                       |                                                                                                                                                  |
|                      | Retreatment                       | 91  | 24.5 ± 6           | 49.6 ± 7           | 22.6 ± 8                          | >3 (32%)  |           | 1078‡                | Hct                      | 36.6 ± 0.82           |                                                                                                                                                  |
|                      |                                   |     |                    |                    |                                   | 1 (35%)   |           | (4–53719)            | 28.2 ± 5%                |                       |                                                                                                                                                  |
|                      |                                   |     |                    |                    |                                   | 2–3 (35%) |           |                      |                          |                       |                                                                                                                                                  |
|                      |                                   |     |                    |                    |                                   | >3 (31%)  |           |                      |                          |                       |                                                                                                                                                  |
| McGready, 2001b [77] | Artemisinins                      | 229 |                    |                    |                                   |           |           |                      |                          |                       | Including 55 cases of severe or hyperparasitaemia. Parasitaemia of uncomplicated cases are shown.                                                |
|                      | Primary treatment                 |     |                    |                    |                                   |           |           | 1023‡                | Hct                      |                       |                                                                                                                                                  |
|                      | Retreatment                       | 310 | 24.8 ± 6.4 (14–48) | 48.8 ± 6.7 (32–78) | 24.6 ± 9.3 (3–40)                 | 3* (1–17) | 1* (0–14) | 1412‡ (16–125892)    | Hct                      | Fever 18%             |                                                                                                                                                  |
|                      |                                   |     |                    |                    |                                   |           |           |                      | 28.9 ± 5.1 %             |                       |                                                                                                                                                  |
|                      |                                   |     |                    |                    |                                   |           |           |                      | Hct                      |                       |                                                                                                                                                  |
|                      |                                   |     |                    |                    |                                   |           |           |                      | 28.1 ± 5.1 %             |                       |                                                                                                                                                  |
| Laochan, 2015 [78]   | AS                                | 151 | 24.5*              | 47*                | 21* (4–37)                        | NA        | NA        | 3216*                | Hct                      | 36.8*                 | Summary of all 700 pregnant women included in the analysis except gestational age.                                                               |
|                      | AAP                               | 11  | (14–45)            | (30–78)            | 23* (18–32)                       |           |           | (16.4–4768)          | 31* (12–48) %            | (35.0–40.4)           |                                                                                                                                                  |
|                      | AC                                | 143 |                    |                    | 23* (1–39)                        |           |           |                      |                          |                       |                                                                                                                                                  |
|                      | AL                                | 43  |                    |                    | 23* (13–36)                       |           |           |                      |                          |                       |                                                                                                                                                  |
|                      | ASMQ                              | 5   |                    |                    | 28* (-0.4–39)                     |           |           |                      |                          |                       |                                                                                                                                                  |
|                      | DP                                | 29  |                    |                    | 20* (8–34)                        |           |           |                      |                          |                       |                                                                                                                                                  |
|                      | Q                                 | 476 |                    |                    | 17* (3–36)                        |           |           |                      |                          |                       |                                                                                                                                                  |
|                      | QC                                | 29  |                    |                    | 10* (4–24)                        |           |           |                      |                          |                       |                                                                                                                                                  |
|                      | MQ                                | 22  |                    |                    | 26* (12–38)                       |           |           |                      |                          |                       |                                                                                                                                                  |
| McGready, 2002 [79]  | Q                                 | 204 | 24 ± 7 (14–42)     | 45.4 ± 5.9 (35–66) | 7.9 ± 2.8 (1.0–12.8)              | 2* (1–13) | 1* (0–10) | 1230‡ (15.8–138038)  | Anaemia <sup>a</sup> 29% | Fever 18%             |                                                                                                                                                  |
| McGready, 2003b [80] | AAP                               | 27  | 25* (16–38)        | NA                 | 28.2* (-1.6–37.3)                 | 3* (1–7)  | 1* (0–6)  | 2206‡ (16–309030)    | Hct                      | Fever 7%              |                                                                                                                                                  |
|                      |                                   |     |                    |                    |                                   |           |           |                      | 29.3 ± 5.1 %             |                       |                                                                                                                                                  |
| Villegas, 2005 [81]  | ASMQ                              | 27  | NA                 | NA                 | NA                                | NA        | NA        | NA                   | NA                       | NA                    | Conference abstract                                                                                                                              |

Additional file 7 continued.

| Study [reference]       | Treatment group | N      | Age (year)    | Weight (kg)    | Gestational age at malaria (week) | Gravidity | Parity    | Parasitaemia (/μL) | Haemoglobin (g/dL)       | Body temperature (°C)  | Note                                                                                                             |
|-------------------------|-----------------|--------|---------------|----------------|-----------------------------------|-----------|-----------|--------------------|--------------------------|------------------------|------------------------------------------------------------------------------------------------------------------|
| Rijken, 2008 [82]       | DP              | 62     | 24* (16–39)   | 48 ± 6 (36–60) | 23.7 ± 8.2 (9.2–39.1)             | 2* (1–12) | 1* (0–9)  | 1951‡ (12–85114)   | Hct 29.9 ± 4.3 % (18–37) | 36.6 ± 1.0 (35.1–40.0) | 62 episodes in 50 patients.                                                                                      |
| Rulisa, 2012 [83]       | AL              | (1072) | 26.0* (17–48) | NA             | 25.8* (95%CI 25.3–26.4)           | 2* (1–12) | 1* (0–10) | NA                 | NA                       | NA                     | Including patients with clinical diagnosis. The number of patients with confirmed parasitaemia is not specified. |
| Kalilani, 2013 [84, 85] | AL              | 56     | NA            | NA             | NA                                | NA        | NA        | NA                 | NA                       | NA                     | Only summary of the whole cohort including women without malaria was reported.                                   |

AAP: artesunate-atovaquone-proguanil, AC: artesunate-clindamycin, AL: artemether-lumefantrine, AQ: amodiaquine, AS: artesunate, CHQ: chloroquine, CI: confidence interval, DP: dihydroartemisinin-piperaquine, EGA: estimated gestational age, Hct: haematocrit, IQR: inter-quartile range. MQ: mefloquine, N: number of pregnant women who were assessed, NA: data not available, Q: quinine, QC: quinine-clindamycin, SP: sulfadoxine-pyrimethamine, tri: trimester.

Figures are shown in mean (± standard deviation) unless indicated otherwise. \*: median. ‡: geometric mean. Rages are shown in ( ) and inter-quartile ranges are shown in [ ]. Gestational age at malaria, parasitaemia and haemoglobin were shown in week, /μL and g/dL, respectively, unless indicated otherwise. Gestational age, gravidity and parity are shown as category (%) depending on the reporting.

<sup>a</sup>: anaemia was defined as haematocrit <30%.
