# Supplementary material for: Systematic literature review and meta-analysis of the efficacy of artemisinin-based and quinine-based treatments for uncomplicated falciparum malaria in pregnancy: methodological challenges
Source: Springer Nature journal article supplement (doi:10.1186/s12936-017-2135-y), 2017-12-01
Supplement: MOESM8 [file 15304954]

## Additional file 8. Summary of gametocyte carriage

Gametocytes were assessed in 16 studies (33%, 16/48). ABT was more effective in clearing and also suppressing the development of gametocytaemia than non-ABT. AL showed better gametocyte clearance on day 2 and day 7 than quinine [48]. The proportion of gametocytaemia development after treatment was lower in artesunate-atovaquone-proguanil (AAP) than in quinine (5% and 29%, respectively) [42] and the prevalence of gametocytes on day 14 was lower in ASAQ than in SP (5% and 31%, respectively) [46].

Gametocyte carriage defined by the number of weeks with positive gametocytaemia divided by the total number of weeks of follow-up was 2–26.8/1000 person-week in ABT and 39–92.7/1000 person-week in QBT in studies conducted on the Thailand-Myanmar border (Table in Additional file 8). This difference was significant in three RCTs directly comparing ABT and QBT [40-42]. Gametocyte carriage was not different between the different ABT in two RCTs [45,50].

Table Gametocyte carriage following the quinine-based and artemisinin-based treatments.

| Study [reference]    | Treatment    | Subgroup          | Gametocyte carriage (person-week/1000) |
|----------------------|--------------|-------------------|----------------------------------------|
| McGready, 1998b [76] | Q            | Retreatment       | 92.7 (95%CI 57.4–128)                  |
| McGready, 1998b [76] | Q            | Primary treatment | 79.8 (95%CI 51.5–108.1)                |
| McGready, 2000 [40]  | Q            |                   | 46.9 (95%CI 26–78)                     |
| McGready, 2002 [79]  | Q            |                   | 42.5 (95%CI 27.8–62.1)                 |
| McGready, 2005 [50]  | Q            |                   | 49 (95%CI 26–89)                       |
| McGready, 2001a [41] | QC           |                   | 39 (95%CI 21–66)                       |
| McGready, 2001b [77] | Artemisinins | Retreatment       | 26.8 (95%CI 18.5–37.4)                 |
| Rijken, 2008 [82]    | DP           |                   | 11.7 (95%CI 3.0–36.7)                  |
| McGready, 2001b [77] | Artemisinins | Primary treatment | 11.4 (95%CI 5.5–20.8)                  |
| McGready, 2008 [45]  | AS           |                   | 10 (95%CI 4–21)                        |
| McGready, 2005 [42]  | AAP          |                   | 6 (95%CI 1–25)                         |
| McGready, 2001a [41] | AS           |                   | 3 (95%CI 0–19)                         |
| McGready, 2000 [40]  | ASMQ         |                   | 2.3 (95%CI 0–11)                       |
| McGready, 2008 [45]  | AL           |                   | 2 (95%CI 0–10)                         |

AAP: artesunate-atovaquone-proguanil, AL: artemether-lumefantrine, AS: artesunate, CI: confidence interval, DP: dihydroartemisinin-piperazine, MQ: mefloquine, Q: quinine, QC: quinine-clindamycin.
