# Supplementary material for: Systematic literature review and meta-analysis of the efficacy of artemisinin-based and quinine-based treatments for uncomplicated falciparum malaria in pregnancy: methodological challenges
Source: Springer Nature journal article supplement (doi:10.1186/s12936-017-2135-y), 2017-12-01

PCR-uncorrected day 28

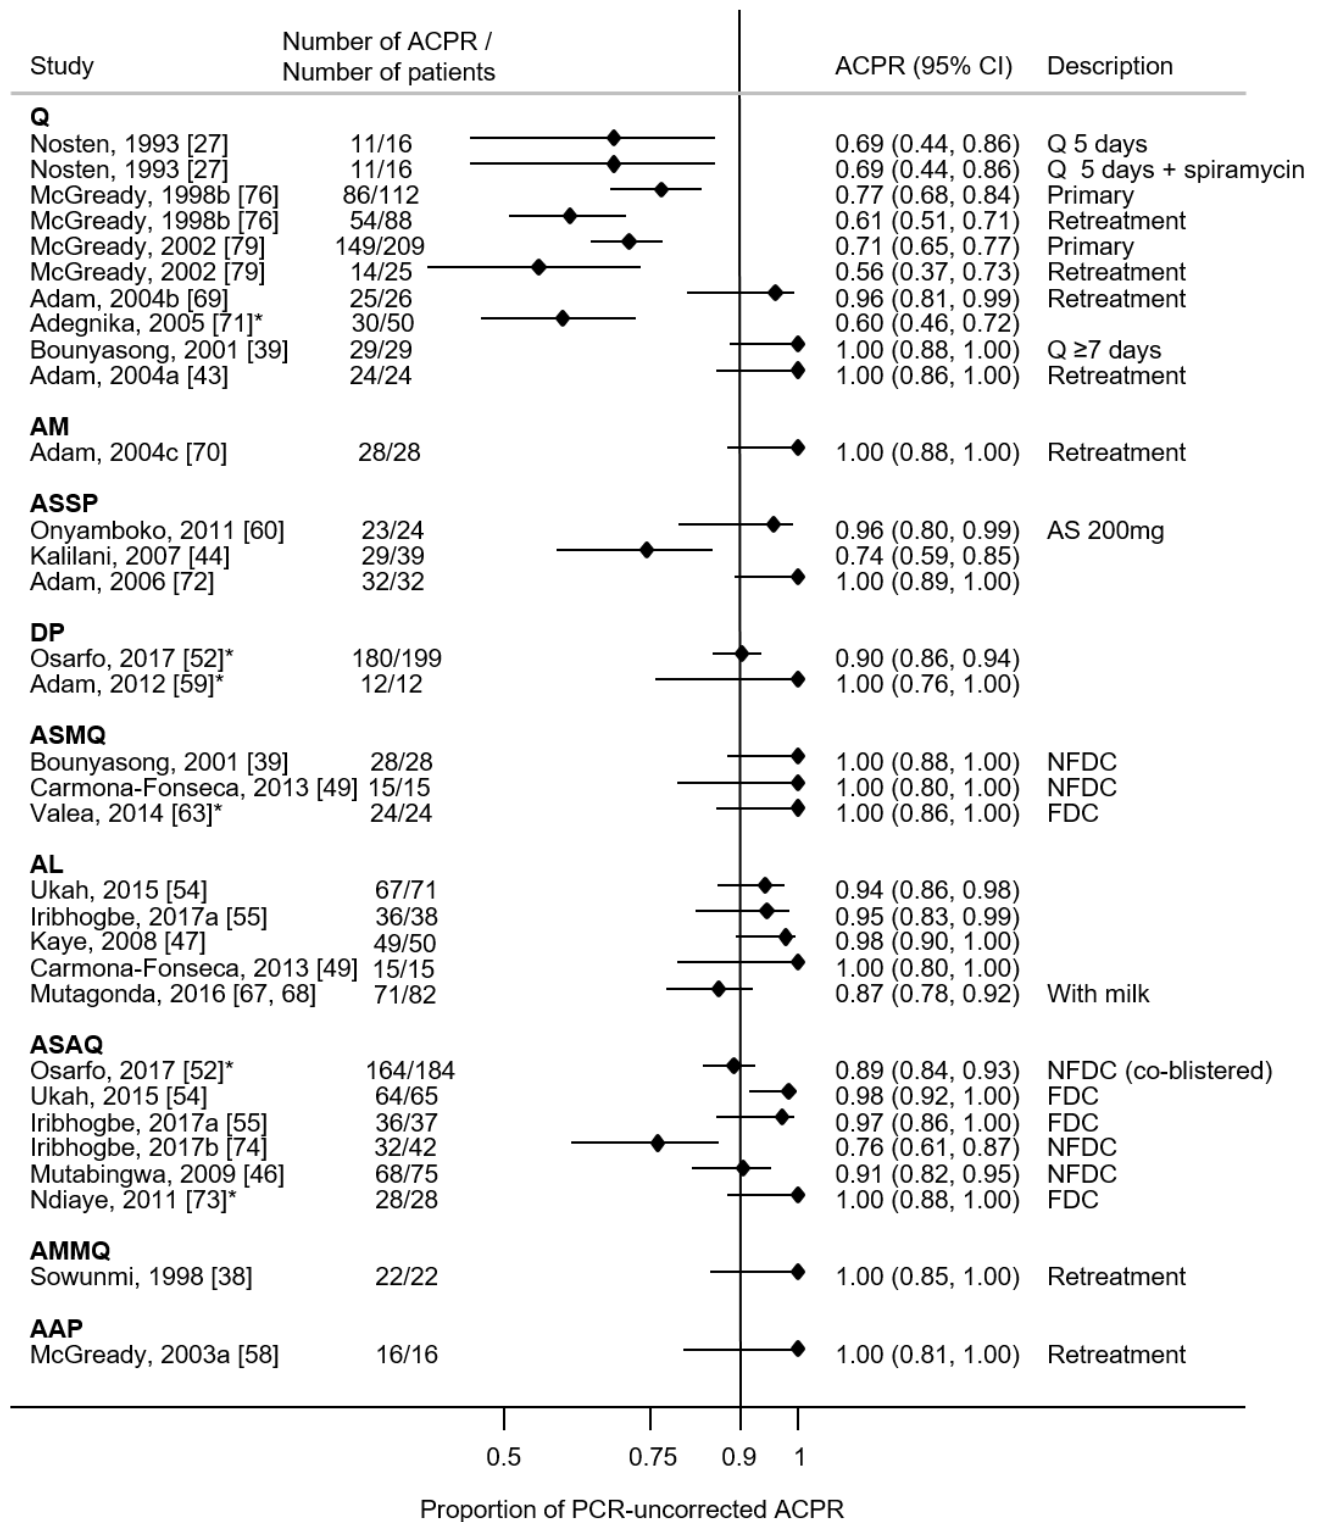

Additional file 10 The PCR-uncorrected proportional adequate clinical and parasitological response (ACPR). ACPR with 95% confidence intervals are shown by treatment group and the duration of follow-up. \*: ACPR at later follow-up day is available. AAP: artesunate + atovaquone-proguanil, AC: artesunate + clindamycin, AL: artemether-lumefantrine, AM: artemether, AS: artesunate, AQ: amodiaquine, DP: dihydroartemisinin-piperazine, FDC: fixed dose combination, MQ: mefloquine, NFDC: non-fixed dose combination, Q: quinine, QC: quinine + clindamycin, SP: sulfadoxine-pyrimethamine.

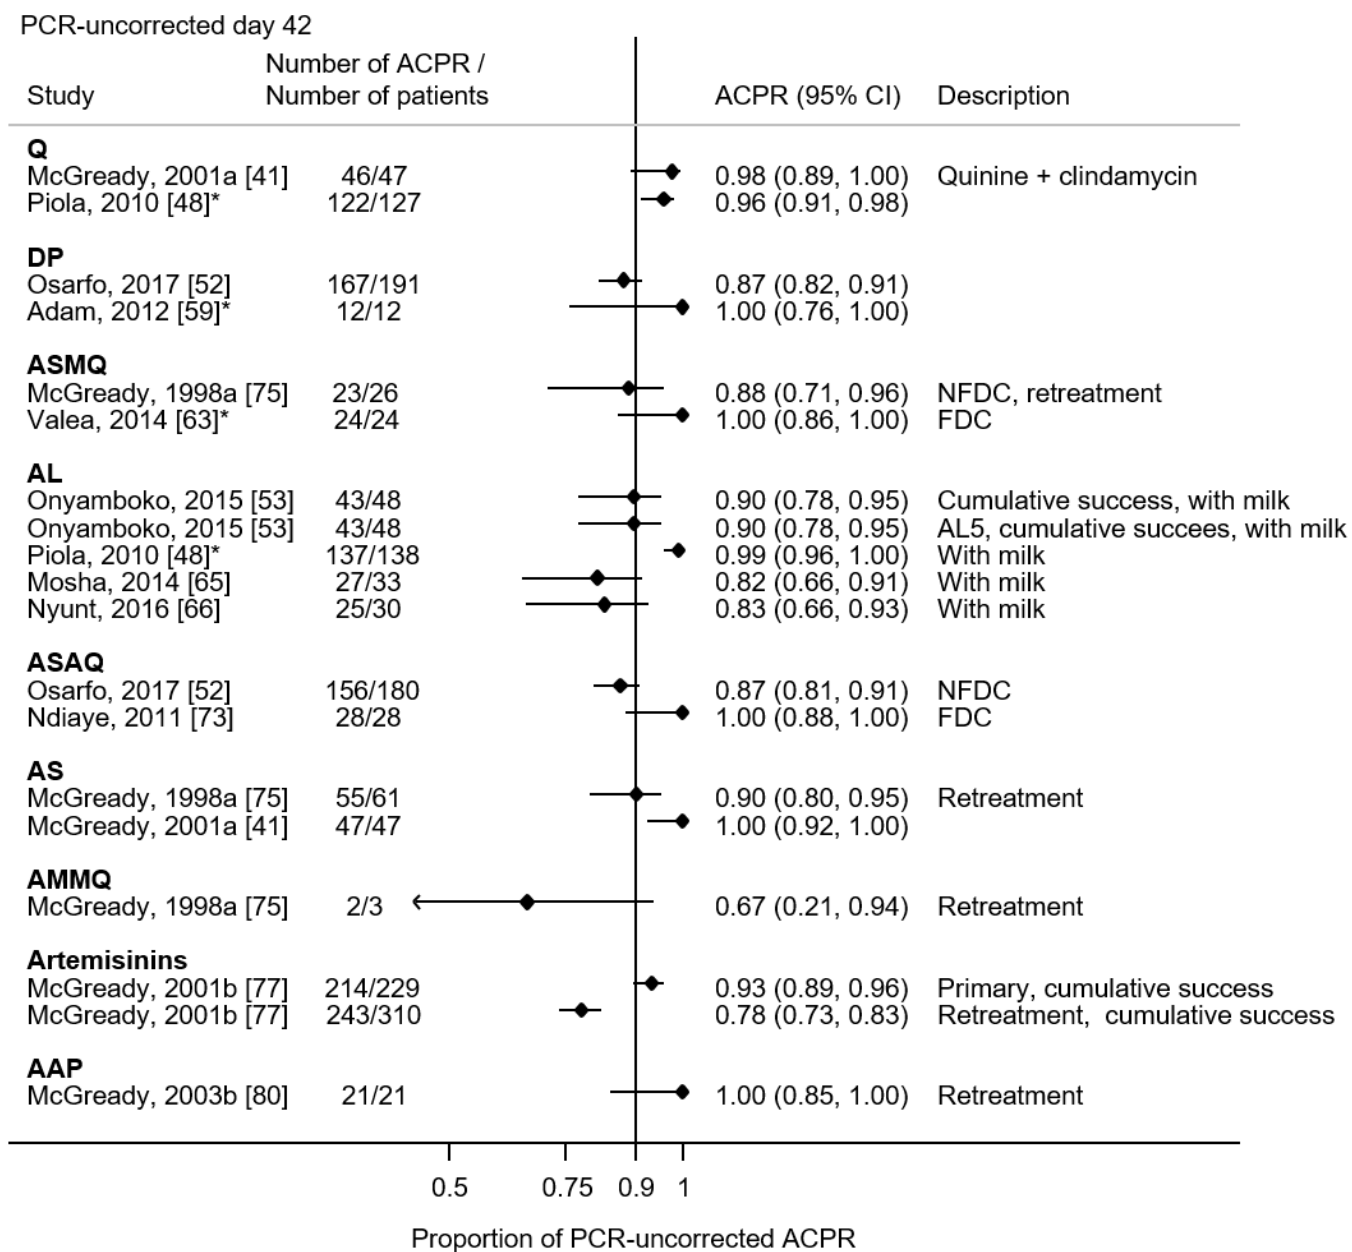

Additional file continued.

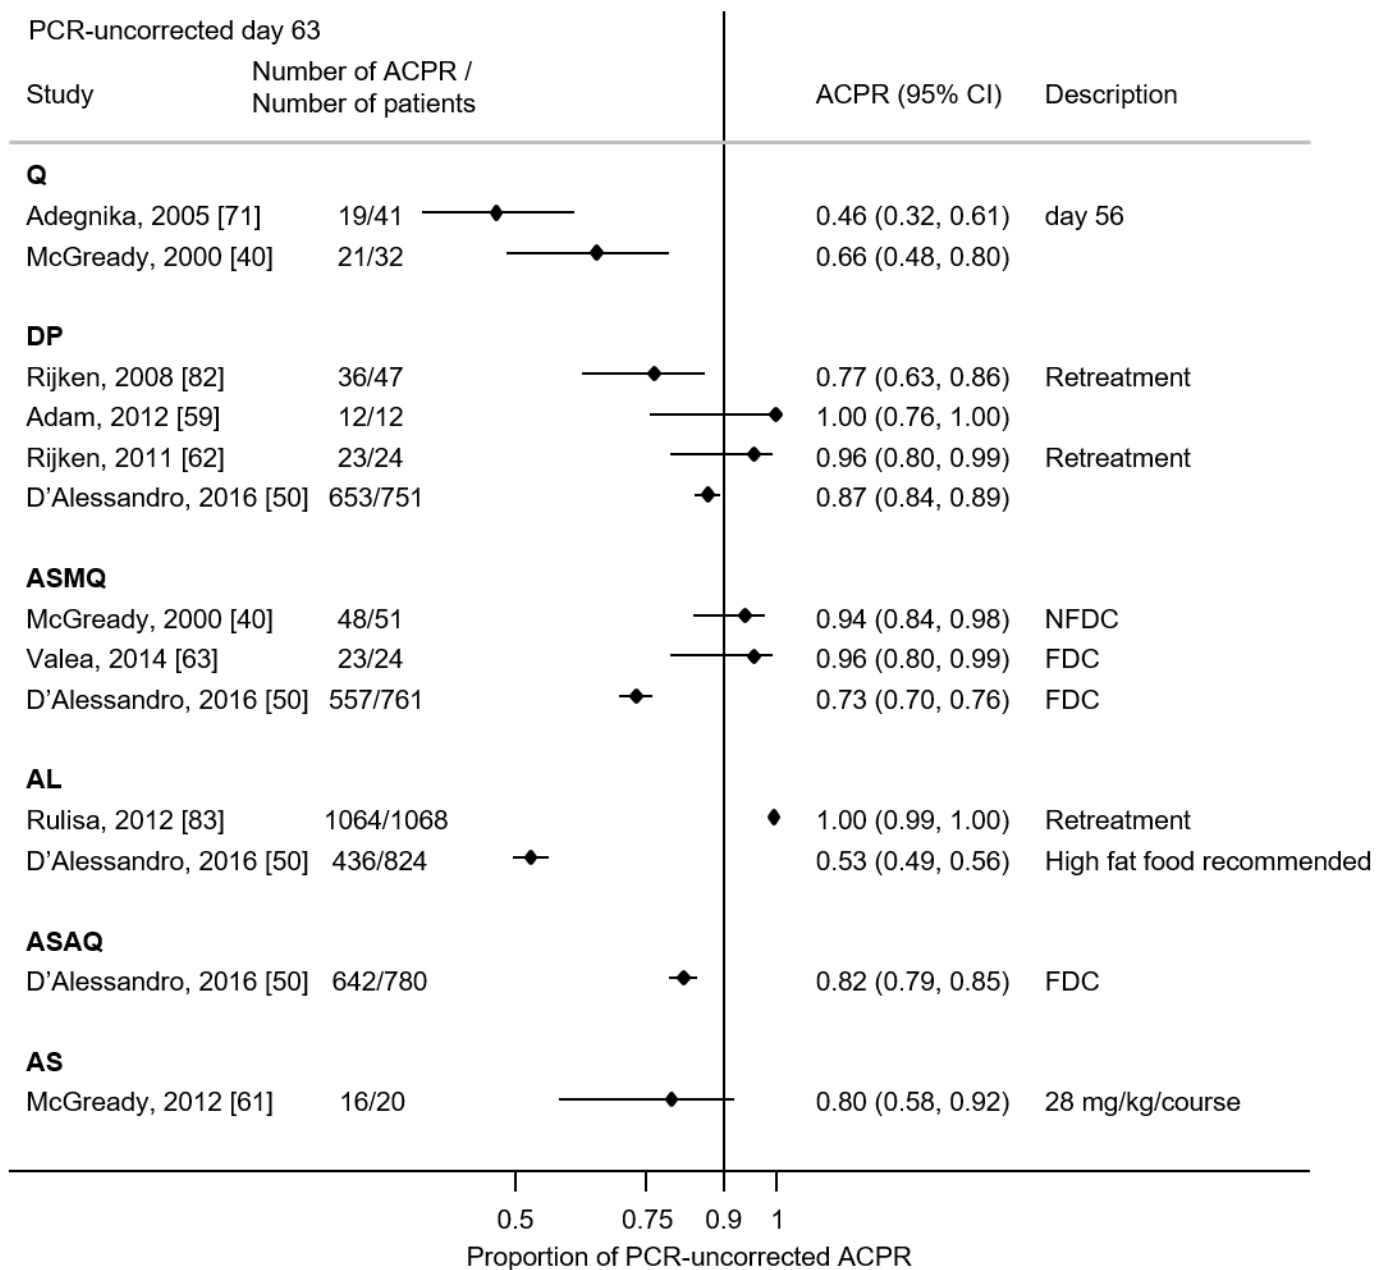

Additional file continued.

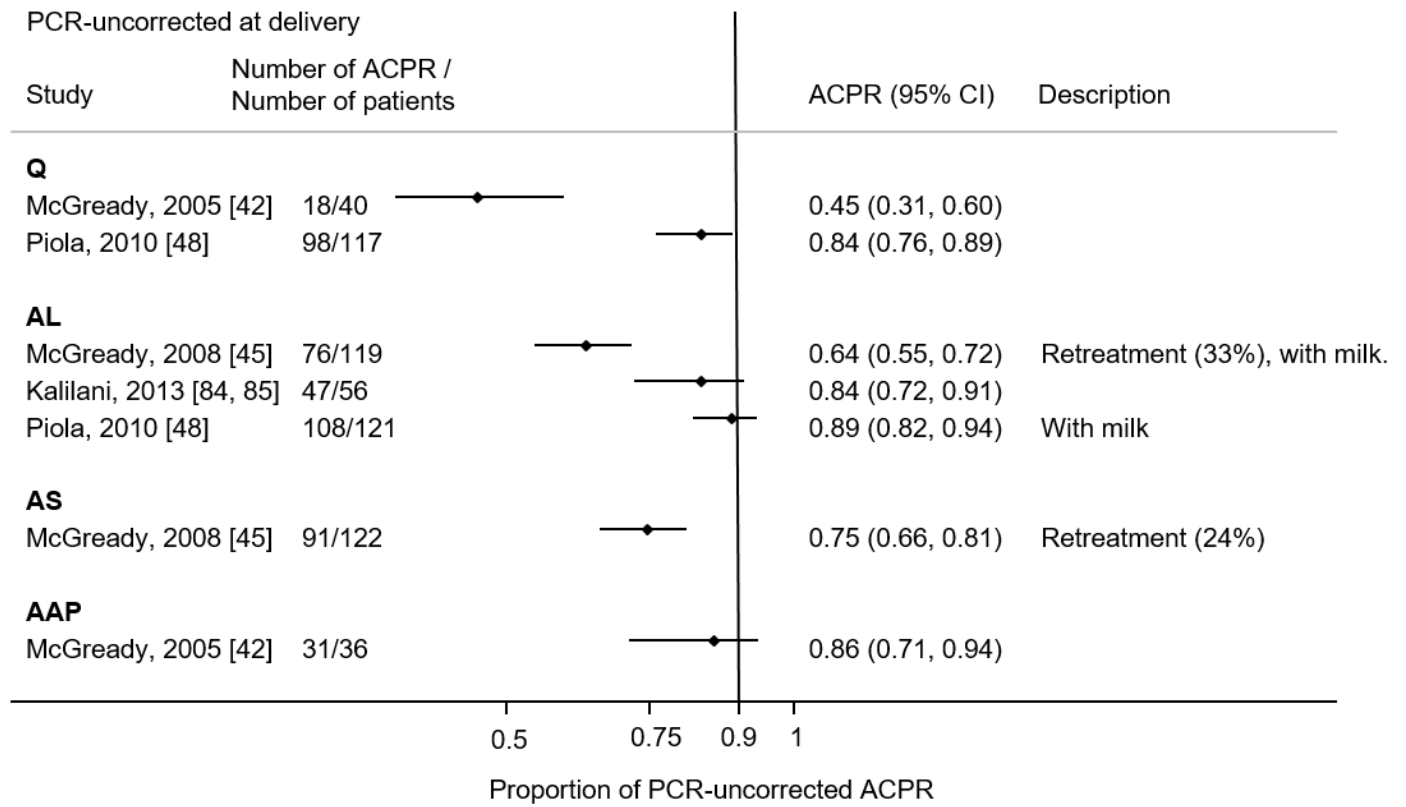

Supplement: MOESM10 [file 15304954]
