# Supplementary material for: Systematic literature review and meta-analysis of the efficacy of artemisinin-based and quinine-based treatments for uncomplicated falciparum malaria in pregnancy: methodological challenges
Source: Springer Nature journal article supplement (doi:10.1186/s12936-017-2135-y), 2017-12-01
Supplement: MOESM11 [file 15304954]

Additional file 11 Summary of evidence profile comparing artemisinin-based and quinine-based treatment

| Quality assessment                                    |                   |                       |               |              |                      |                      | No of patients              |                         | Effect                                 |                                                            | Quality  | Importance |
|-------------------------------------------------------|-------------------|-----------------------|---------------|--------------|----------------------|----------------------|-----------------------------|-------------------------|----------------------------------------|------------------------------------------------------------|----------|------------|
| No of studies                                         | Study design      | Risk of bias          | Inconsistency | Indirectness | Imprecision          | Other considerations | Artemisinin-based treatment | Quinine-based treatment | Relative (95% CI)                      | Absolute (95% CI)                                          |          |            |
| PCR-corrected treatment failure (follow up: 28 days)  |                   |                       |               |              |                      |                      |                             |                         |                                        |                                                            |          |            |
| 1<br>[39]                                             | randomised trials | very serious<br>a,b,c | not serious   | not serious  | very serious<br>d,e  |                      | 0/28                        | 0/29                    | <b>Rate ratio 1.0</b><br>(0.0 to 50.4) | -                                                          | Very Low | CRITICAL   |
| PCR-corrected treatment failure (follow up: 42 days)  |                   |                       |               |              |                      |                      |                             |                         |                                        |                                                            |          |            |
| 2<br>[41, 48]                                         | randomised trials | serious<br>a,b        | not serious   | not serious  | serious <sup>d</sup> |                      | 1/185 (0.5%)                | 3/170 (1.8%)            | <b>RR 0.39</b><br>(0.06 to 2.62)       | <b>11 fewer per 1,000</b><br>(from 17 fewer to 29 more)    | Low      | CRITICAL   |
| PCR-corrected treatment failure (follow up: 63 days)  |                   |                       |               |              |                      |                      |                             |                         |                                        |                                                            |          |            |
| 1<br>[40]                                             | randomised trials | serious<br>a,b        | not serious   | not serious  | not serious          | Large effect         | 0/63 (0.0%)                 | 9/40 (22.5%)            | <b>RR 0.03</b><br>(0.00 to 0.56)       | <b>218 fewer per 1,000</b><br>(from -- to 99 fewer)        | Moderate | CRITICAL   |
| PCR-corrected treatment failure (follow up: delivery) |                   |                       |               |              |                      |                      |                             |                         |                                        |                                                            |          |            |
| 2<br>[42, 48]                                         | randomised trials | serious<br>a,b        | not serious   | not serious  | not serious          | Large effect         | 4/143 (2.8%)                | 19/135 (14.1%)          | <b>RR 0.20</b><br>(0.07 to 0.58)       | <b>113 fewer per 1,000</b><br>(from 59 fewer to 131 fewer) | Moderate | CRITICAL   |

| Quality assessment                               |                   |                               |                      |                      |                      |                      | No of patients                                                                                                                                                                                              |                         | Effect                           |                                                             | Quality   | Importance |
|--------------------------------------------------|-------------------|-------------------------------|----------------------|----------------------|----------------------|----------------------|-------------------------------------------------------------------------------------------------------------------------------------------------------------------------------------------------------------|-------------------------|----------------------------------|-------------------------------------------------------------|-----------|------------|
| No of studies                                    | Study design      | Risk of bias                  | Inconsistency        | Indirectness         | Imprecision          | Other considerations | Artemisinin-based treatment                                                                                                                                                                                 | Quinine-based treatment | Relative (95% CI)                | Absolute (95% CI)                                           |           |            |
| Placental malaria                                |                   |                               |                      |                      |                      |                      |                                                                                                                                                                                                             |                         |                                  |                                                             |           |            |
| 1<br>[48]                                        | randomised trials | serious <sup>a</sup>          | not serious          | serious <sup>f</sup> | serious <sup>d</sup> |                      | 5/110 (4.5%)                                                                                                                                                                                                | 5/102 (4.9%)            | <b>RR 0.93</b><br>(0.28 to 3.11) | <b>3 fewer per 1,000</b><br>(from 35 fewer to 103 more)     | Very low  | IMPORTANT  |
| Gametocyte carriage (assessed with: person-week) |                   |                               |                      |                      |                      |                      |                                                                                                                                                                                                             |                         |                                  |                                                             |           |            |
| 3<br>[40-42]                                     | randomised trials | serious <sup>a,b</sup>        | not serious          | not serious          | not serious          |                      | A significant difference was reported in all three RCTs. Q(46.9 (95%CI 26-78)) vs ASMQ (2.3 (95%CI 0-11)); QC (39 (95%CI 21-66)) vs AS (3 (95%CI 0-19)); Q (42.5 (95%CI 27.8-62.1)) vs AAP (6 (95%CI 1-25)) |                         |                                  | Moderate                                                    | IMPORTANT |            |
| Tinnitus                                         |                   |                               |                      |                      |                      |                      |                                                                                                                                                                                                             |                         |                                  |                                                             |           |            |
| 5<br>[39-42, 48]                                 | randomised trials | serious <sup>a,b,c</sup>      | not serious          | not serious          | not serious          | Large effect         | 42/303<br>(13.9%)                                                                                                                                                                                           | 221/298<br>(74.2%)      | <b>RR 0.21</b><br>(0.05 to 0.83) | <b>586 fewer per 1,000</b><br>(from 126 fewer to 705 fewer) | High      | IMPORTANT  |
| Vomiting                                         |                   |                               |                      |                      |                      |                      |                                                                                                                                                                                                             |                         |                                  |                                                             |           |            |
| 5<br>[39-42, 48]                                 | randomised trials | very serious <sup>a,b,c</sup> | serious <sup>g</sup> | not serious          | not serious          |                      | 39/330<br>(11.8%)                                                                                                                                                                                           | 78/316 (24.7%)          | <b>RR 0.49</b><br>(0.29 to 0.84) | <b>126 fewer per 1,000</b><br>(from 39 fewer to 175 fewer)  | Moderate  | IMPORTANT  |

| Quality assessment   |                   |                               |                      |                           |                           |                      | No of patients                                                                                                                                                                                                                                                                                                                                 |                         | Effect                           |                                                             | Quality   | Importance |
|----------------------|-------------------|-------------------------------|----------------------|---------------------------|---------------------------|----------------------|------------------------------------------------------------------------------------------------------------------------------------------------------------------------------------------------------------------------------------------------------------------------------------------------------------------------------------------------|-------------------------|----------------------------------|-------------------------------------------------------------|-----------|------------|
| No of studies        | Study design      | Risk of bias                  | Inconsistency        | Indirectness              | Imprecision               | Other considerations | Artemisinin-based treatment                                                                                                                                                                                                                                                                                                                    | Quinine-based treatment | Relative (95% CI)                | Absolute (95% CI)                                           |           |            |
| Dizziness            |                   |                               |                      |                           |                           |                      |                                                                                                                                                                                                                                                                                                                                                |                         |                                  |                                                             |           |            |
| 3<br>[40, 41, 48]    | randomised trials | serious <sup>a,b</sup>        | serious <sup>g</sup> | not serious               | not serious               |                      | 33/198 (16.7%)                                                                                                                                                                                                                                                                                                                                 | 49/202 (24.3%)          | <b>RR 0.66</b><br>(0.44 to 0.98) | <b>82 fewer per 1,000</b><br>(from 5 fewer to 136 fewer)    | Moderate  | IMPORTANT  |
| Hypoglycemia         |                   |                               |                      |                           |                           |                      |                                                                                                                                                                                                                                                                                                                                                |                         |                                  |                                                             |           |            |
| 1<br>[39]            | randomised trials | very serious <sup>a,b,c</sup> | not serious          | not serious               | not serious               | Large effect         | 3/28 (10.7%)                                                                                                                                                                                                                                                                                                                                   | 21/29 (72.4%)           | <b>RR 0.15</b><br>(0.05 to 0.44) | <b>616 fewer per 1,000</b><br>(from 406 fewer to 688 fewer) | Low       | CRITICAL   |
| Haemoglobin on day 7 |                   |                               |                      |                           |                           |                      |                                                                                                                                                                                                                                                                                                                                                |                         |                                  |                                                             |           |            |
| 3<br>[40, 41, 48]    | randomised trials | serious <sup>a</sup>          | not serious          | not serious               | not serious               |                      | There was a significant difference in the changes of haemoglobin level between AL (-0.5g/dL) and quinine (+0.3g/dL). The mean haematocrit on day 7 was lower in ASMQ (27.5±3.9%) than in quinine (29.5±4.4%). The mean haematocrit on day 7 was lower in artesunate than in quinine + clindamycin (27.6 ± 4.2% and 29.6 ± 4.1%, respectively). |                         |                                  | Low                                                         | IMPORTANT |            |
| Pregnancy loss       |                   |                               |                      |                           |                           |                      |                                                                                                                                                                                                                                                                                                                                                |                         |                                  |                                                             |           |            |
| 5<br>[39-42, 48]     | randomised trials | not serious                   | not serious          | very serious <sup>h</sup> | very serious <sup>d</sup> |                      | 9/297 (3.0%)                                                                                                                                                                                                                                                                                                                                   | 8/319 (2.5%)            | <b>RR 1.04</b><br>(0.41 to 2.66) | <b>1 more per 1,000</b><br>(from 15 fewer to 42 more)       | Low       | CRITICAL   |

| Quality assessment     |                   |              |               |                           |                           |                      | № of patients               |                         | Effect                           |                                                      | Quality | Importance |
|------------------------|-------------------|--------------|---------------|---------------------------|---------------------------|----------------------|-----------------------------|-------------------------|----------------------------------|------------------------------------------------------|---------|------------|
| № of studies           | Study design      | Risk of bias | Inconsistency | Indirectness              | Imprecision               | Other considerations | Artemisinin-based treatment | Quinine-based treatment | Relative (95% CI)                | Absolute (95% CI)                                    |         |            |
| Congenital abnormality |                   |              |               |                           |                           |                      |                             |                         |                                  |                                                      |         |            |
| 5<br>[39-42, 48]       | randomised trials | not serious  | not serious   | very serious <sup>h</sup> | very serious <sup>d</sup> |                      | 4/297 (1.3%)                | 3/319 (0.9%)            | <b>RR 1.39</b><br>(0.32 to 6.14) | <b>4 more per 1,000</b><br>(from 6 fewer to 48 more) | Low     | CRITICAL   |

CI: Confidence interval; RR: Risk ratio by a random effects model.

a. Open-label studies b. Allocation concealment is not clear. c. Randomisation is not clear. d. Wide CI including 1.0. e. Sample size was not calculated beforehand. f. It is difficult to show which malaria episode in pregnancy is the cause of the placental malaria. g. The overall prevalence was very different. h. This outcome can be caused by many factors.

High Further research is very unlikely to change our confidence in the estimate of effect.

Moderate Further research is likely to have an important impact on our confidence in the estimate of effect and may change the estimate.

Low Further research is very likely to have an important impact on our confidence in the estimate of effect and is likely to change the estimate.

Very low Any estimate of effect is very uncertain.
