# Supplementary material for: Systematic literature review and meta-analysis of the efficacy of artemisinin-based and quinine-based treatments for uncomplicated falciparum malaria in pregnancy: methodological challenges
Source: Springer Nature journal article supplement (doi:10.1186/s12936-017-2135-y), 2017-12-01
Supplement: MOESM12 [file 15304954]

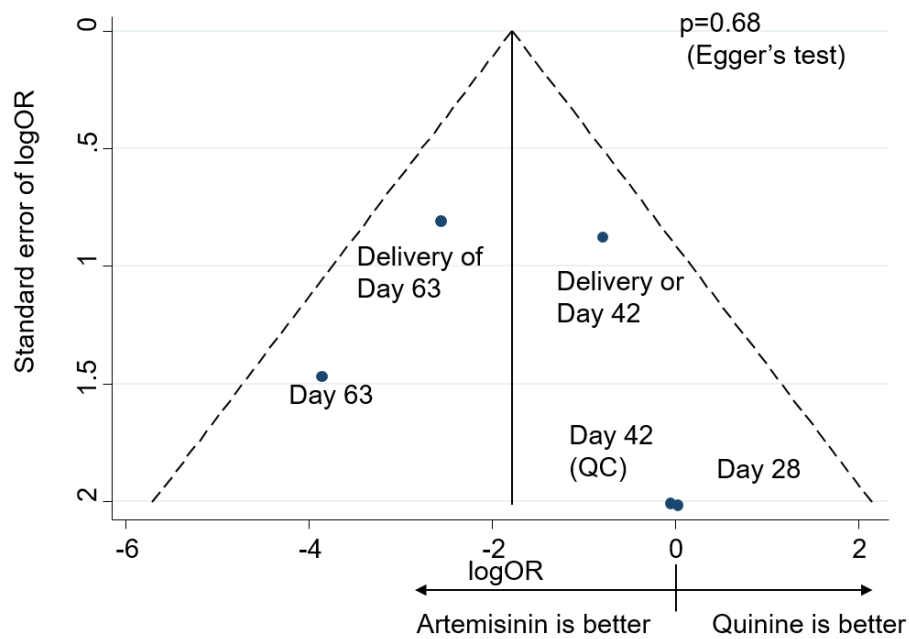

Additional file 12 Funnel plot of odds ratio (OR) of PCR-corrected treatment failure comparing quinine-based and artemisinin-based treatments. Continuity correction was made for the studies without treatment failure by adding 0.5. QC: quinine + clindamycin.
