# Supplementary material for: Systematic literature review and meta-analysis of the efficacy of artemisinin-based and quinine-based treatments for uncomplicated falciparum malaria in pregnancy: methodological challenges
Source: Springer Nature journal article supplement (doi:10.1186/s12936-017-2135-y), 2017-12-01
Supplement: MOESM13 [file 15304954]

Additional file 13. The methodology of assessing placental malaria

| <b>Study [reference]</b> | <b>Method of evaluating placental malaria</b>                                                                                                             |
|--------------------------|-----------------------------------------------------------------------------------------------------------------------------------------------------------|
| Bounyasong, 2001 [39]    | Calcification of placenta<br>Pathological examination of placenta                                                                                         |
| Kalilani, 2007 [44]      | Placental blood and cord blood thick smears<br>Placental histopathology (Rogerson method)                                                                 |
| McGready, 2008 [45]      | Placental blood (smear and PCR)<br>Cord blood (smear and PCR)                                                                                             |
| Mutabingwa, 2009 [46]*   | Placental blood smear<br>Cord blood smear                                                                                                                 |
| Piola, 2010 [48]         | Placental histopathology (Rogerson method)<br>Placental blood (smear and PCR)<br>Placental crush smear<br>Cord blood (smear and PCR)                      |
| D'Alessandro, 2016 [50]  | Placental biopsy Giemsa stain.<br>Placental histopathology (Ismail method)                                                                                |
| Osarfo, 2017 [52]        | Placental parasitaemia<br>Cord blood parasitaemia                                                                                                         |
| Onyamboko, 2015 [53]     | Yes (details not available)                                                                                                                               |
| NCT01054248 [57]         | Cord blood (smear and PCR)<br>Placenta (smear and PCR)<br>Placenta histopathology                                                                         |
| Rijken, 2011 [62]        | Placental smear                                                                                                                                           |
| Adegnika, 2005 [71]      | Placental thick blood smear                                                                                                                               |
| Ndiaye, 2011 [73]        | Placental blood<br>Cord blood                                                                                                                             |
| McGready, 2003b [80]     | Placental smear                                                                                                                                           |
| Kalilani, 2013 [84, 85]  | Placental histopathology (Presence of parasites or pigment were regarded as positive.)<br>Placental blood quantitative PCR if histopathology is positive. |

PCR: polymerase chain reaction.

\* Planned in the protocol but not reported.
